# Supplementary material for: Tapetal Expression of BnaC.MAGL8.a Causes Male Sterility in Arabidopsis
Source: Front Plant Sci. 2019 Jun 12;10:763. doi: 10.3389/fpls.2019.00763 (PMC6582705; doi:10.3389/fpls.2019.00763)
Supplement: Supplementary file 2 [file Data_Sheet_2.xlsx]

## Sheet: Table S1
Table S1 Primers used in this study.
Name	Sequence	Used for	Source
BnA9_LP	AAAAAGCTTCTAGTCCAATAATGTGAGTC	Expression vector	This study
BnA9_RP	AAACTGCAGTTTGTTTAGATATTGTAGGA	Expression vector	This study
BnaC.MAGL8.a_LP	AAATCTAGAATGCAGGCAAGTGAAACAGA	Expression vector	This study
BnaC.MAGL8.a_RP	AAGGTACCCTACTCTTTCGAAGTGAAGC	Expression vector	This study
NosT_LP	AAAGGTACCGATCGTTCAAACATTTGGCA	Expression vector	This study
NosT_RP	AAAGAGCTCGATCTAGTAACATAGATGAC	Expression vector	This study
BnaC.MAGL8.a_LP	AAAGCGGCCGCATGCAGGCAAGTGAAACAG	Protein purification	This study
BnaC.MAGL8_RP	AAAGTCGACCTACTCTTTCGAAGTGAAGC	Protein purification	This study
AtMAGL8_LP	AAAGGATCCATGGCAAGTGAAACAGAGA	Protein purification	This study
AtMAGL8_RP	AAAGAATTCCTACCCTTTCAAAGGAATACC	Protein purification	This study
CYP704P1_LP	AGTAGTGGTTCCAATGCCATTCAC	Realtime PCR	(Zhang et al., 2006)
CYP704P1_RP	AAGCAATGCCTCAGAGCCTATG	Realtime PCR	(Zhang et al., 2006)
AMS_LP	TCGCTTGTTCCCAGGATAACC	Realtime PCR	(Zhang et al., 2006)
AMS_RP	TTCCAGCAACGAGTTCCTTACG	Realtime PCR	(Zhang et al., 2006
CYP98A8_LP	GCCATCGTTGAGAAAGAACATCTT	Realtime PCR	(Matsuno et al., 2009)
CYP98A8_RP	AACCCATTTGAGCCACCAGAC	Realtime PCR	(Matsuno et al., 2009)
TEM1_LP	ATCCACTGGAAAGTCCGGTCTA	Realtime PCR	(Osnato et al., 2012)
TEM1_RP	GAATAGCCTAACCACAGTCTGAACC	Realtime PCR	(Osnato et al., 2012)
AT3G58550_LP	GAGAGAGCACCAGCCATCATTA	Realtime PCR	This study
AT3G58550_RP	CCCTCTCTGTCTCTGCGACAA	Realtime PCR	This study
BnaC.MAGL8.a_RT_LP	AAGATGATAAAGTCACGGACAAAGC	Realtime PCR	This study
BnaC.MAGL8.a_RT_RP	CCGAACTCGACGCAACTTC	Realtime PCR	This study
MS188LP	GAAGAAGAAGTTGTCAGGAA	Real-time PCR	(Lou et al., 2018)
MS188RP	GTGAGCAAGTGAAGCATCT	Real-time PCR	(Lou et al., 2018)
ACOS5LP	GTTTGTAGAAGCGGTGAC	Real-time PCR	(Wang et al., 2018)
ACOS5RP	GCAATAATCCCATACTCG	Real-time PCR	(Wang et al., 2018)
CYP703A2LP	TATTGCCGTTTAGTGCC	Real-time PCR	(Wang et al., 2018)
CYP703A2RP	GATTGCCCGTAATGGTT	Real-time PCR	(Wang et al., 2018)
CYP704B1LP	AAAGCAGAGTTATTAGAGGCACA	Real-time PCR	(Wang et al., 2018)
CYP704B1RP	TTCCAGCTATTACAAAGTTGAGG	Real-time PCR	(Wang et al., 2018)
PKSBLP	GTCTCCTCAAGCGAAGC	Real-time PCR	(Wang et al., 2018)
PKSBEP	CAAGATCATACGGTCTATCC	Real-time PCR	(Wang et al., 2018)
PKSALP	AGAAGGGCGTTGGTGGA	Real-time PCR	(Wang et al., 2018)
PKSARP	AGGTGAGGCTGCGGATG	Real-time PCR	(Wang et al., 2018)
TKPR1LP	TCCTCGGATTACTGAAAG	Real-time PCR	(Wang et al., 2018)
TKPR1RP	GGGATAGGGAGTGATGG	Real-time PCR	(Wang et al., 2018)
TKPR2LP	AACTGTCCGAAACCCAC	Real-time PCR	(Wang et al., 2018)
TKPR2RP	TCACATTTGTTGTACCCT	Real-time PCR	(Wang et al., 2018)
bHLH010LP	AAAGGAAGAGGATCAAGAAAGTCGAGAAC	Real-time PCR	(Zhu et al., 2015)
bHLH010RP	TCCTCCTCCTTCACCAACTCTAGC	Real-time PCR	(Zhu et al., 2015)
bHLH089LP	CCAAGATCCTCACTTCCACCTTTCGCAAAC	Real-time PCR	(Zhu et al., 2015)
bHLH089RP	TCGCTTCTCCGACGATTGATGCTCTATC	Real-time PCR	(Zhu et al., 2015)
bHLH091LP	AGCTGGTGGTAACCTTCAAAGACG	Real-time PCR	(Zhu et al., 2015)
bHLH091RP	CGGTGGTTGAAACTGGTGGC	Real-time PCR	(Zhu et al., 2015)
DYT1LP	CAGAGAAGAGAGATGGGATC	Real-time PCR	(Zhu et al., 2015)
DYT1RP	CAACATCACAGAGTTCCTGTG	Real-time PCR	(Zhu et al., 2015)
MS2QLP	AAAGGTTCGGTCCCACTTGG	Real-time PCR	(Zhang et al., 2006)
MS2QRP	ATGTTTCCGGTCACAGGGATG	Real-time PCR	(Zhang et al., 2006)
AtPP2AAF1	TCAATCCGTGAAGCTGCTGCAAAC	Real-time PCR	(Singer et al., 2016)
AtPP2AAR1	ACTGCACGAAGAATCGTCATCCGA	Real-time PCR	(Singer et al., 2016)

## Sheet: Table S2
Table S2 MAG substrates used in this study.
Lipid substrates	sn-1	sn-2	source
MAG	16:0		Sigma-Aldrich
MAG	16:1		Sigma-Aldrich
MAG	18:1		Sigma-Aldrich
MAG		18:1	Sigma-Aldrich
MAG	18:2		Sigma-Aldrich

## Sheet: Table S3
Table S3 BnMAGL transgenic lines.
Darmor_ID	Gene_Name	Promoters
		BnA9	CaMV35S
BnaA08g25460D	BnaA.MAGL1.a		8
BnaC08g14710D	BnaC.MAGL1.b	8
BnaA07g22650D	BnaA.MAGL4.a	9	1
BnaA02g18410D	BnaA.MAGL5.a	5	22
BnaCnng09810D	BnaC.MAGL5.a	9	13
BnaA04g23090D	BnaA.MAGL6.a	1	11
BnaC03g22090D	BnaA.MAGL8.b	12
BnaC04g46320D	BnaC.MAGL8.a	12	20
BnaA04g29600D	BnaA.MAGL9.a	3	7
BnaC04g51170D	BnaC.MAGL9.a	12	24
BnaA09g34870D	BnaA.MAGL10.a	11	14
BnaC08g26060D	BnaC.MAGL10.a		6
BnaC08g32530D	BnaC.MAGL12.b	16	20
BnaA10g20920D	BnaA.MAGL13.b	1
BnaC09g44950D	BnaC.MAGL13.a		5

## Sheet: Table S4
Table S4 Phenotype and pollination test of the BnA9::BnaC.MAGL8.a plants.
No.	Fertile or Sterile	Normal siliques/Pollinated flowers
127	Fertile
125	Sterile	4/4
126	Sterile	15/17
128	Sterile	16/16
129	Fertile
130	Sterile	10/11
131	Sterile	13/15
132	Sterile	9/10
133	Sterile	15/18
135	Sterile	8/8
136	Fertile
137	Sterile	20/23

## Sheet: Table S5
Table S5 Differentially expressed genes identified by transcriptome analysis.
TAIR_ID	Name	Description	W2_.sort.bam	W3_.sort.bam	W4_.sort.bam	O1_.sort.bam	O2_.sort.bam	O3_.sort.bam	baseMean	log2FoldChange	lfcSE	stat	P value	padj
AT5G57810	TETRASPANIN15 (TET15)	Member of TETRASPANIN family	83	8	8	0	0	2	15.1346	-5.45229	1.43051	-3.81144	0.00013816	0.0465991
AT5G53990		UDP-Glycosyltransferase superfamily protein;(source:Araport11)	6	4	14	0	0	0	3.82321	-5.32996	1.75858	-3.03083	0.00243886	0.254409
AT1G10800		voltage-gated hydrogen channel-like protein;(source:Araport11)	14	4	5	0	0	0	3.54184	-5.22423	1.78626	-2.92467	0.00344819	NA
AT4G01970	STACHYOSE SYNTHASE (STS)	Encodes a a raffinose and high affinity stachyose synthase as well as a stachyose and Gol specific galactosylhydrolase enzyme activity.AtRS4 is a sequential multifunctional RafS and StaS as well as a high affinity StaS, accepting only Raf and Gol for Sta product formation. AtRS4 possesses a Sta and Gol specific galactosylhydrolase enzyme activity.	9	6	6	0	0	0	3.31551	-5.12556	1.7657	-2.90284	0.00369798	NA
AT5G13230		Tetratricopeptide repeat (TPR)-like superfamily protein;(source:Araport11)	2	4	14	0	0	0	3.2381	-5.0884	1.91017	-2.66384	0.00772538	NA
AT5G40070		MADS-box family protein;(source:Araport11)	8	6	4	0	0	0	2.84666	-4.90526	1.85235	-2.64813	0.00809379	NA
AT3G05260		NAD(P)-binding Rossmann-fold superfamily protein;(source:Araport11)	6	4	23	0	0	1	5.43892	-4.83214	1.64726	-2.93344	0.00335229	0.297545
AT2G41225	ORGAN SIZE RELATED 2 (OSR2)	Encodes a protein of unknown function that is involved in regulation of cell expansion. Based on sequence similarity OSR2 is localized to the plasma membrane. It is expressed in organs that are undergoing cell expansion. Over-expression modifies plant sensitivity to ethylene, leading to improved drought tolerance.	70	85	32	0	6	3	31.5086	-4.29474	0.755074	-5.68784	1.29e-08	3.25e-05
AT5G64820		transmembrane protein;(source:Araport11)	13	8	20	0	2	0	6.83761	-4.25117	1.3967	-3.04373	0.00233666	0.247575
AT5G46795	MICROSPORE-SPECIFIC PROMOTER 2 (MSP2)	microspore-specific promoter 2;(source:Araport11)	105	12	2	4	0	4	19.1439	-3.67494	1.20138	-3.05893	0.00222125	0.239104
AT4G05210	LIPID X D1 (LPXD1)	Trimeric LpxA-like enzymes superfamily protein;(source:Araport11)	12	28	8	0	0	4	8.51483	-3.54252	1.25326	-2.82663	0.00470402	0.359227
AT4G00350		MATE efflux family protein;(source:Araport11)	50	8	17	2	4	2	12.801	-3.06299	0.934887	-3.27632	0.0010517	0.162467
AT3G21720	ISOCITRATE LYASE (ICL)	Encodes a glyoxylate cycle enzyme isocitrate lyase (ICL).	800	1094	799	139	61	108	487.704	-3.01488	0.324482	-9.29138	1.52e-20	1.03e-16
AT5G44120	CRUCIFERINA (CRA1)	Encodes a 12S seed storage protein. The Landsberg erecta genome contains another copy of 12S globulin gene, CRA2, which is located tandemly with CRA1. Protein is tyrosine-phosphorylated and its phosphorylation state is modulated in response to ABA in Arabidopsis thaliana seeds.	6	21	166	6	6	12	35.3507	-2.93115	0.928407	-3.15718	0.00159301	0.202753
AT3G17570		F-box and associated interaction domains-containing protein;(source:Araport11)	42	12	8	4	0	4	10.8962	-2.77679	1.03981	-2.67047	0.00757448	0.460965
AT5G07070	CBL-INTERACTING PROTEIN KINASE 2 (CIPK2)	Encodes CBL-interacting protein kinase 2 (CIPK2).	30	12	30	1	3	6	12.9628	-2.7373	0.838756	-3.26353	0.00110034	0.167963
AT5G13670	USUALLY MULTIPLE ACIDS MOVE IN AND OUT TRANSPORTERS 15 (UMAMIT15)	nodulin MtN21-like transporter family protein	77	69	11	8	6	10	29.0306	-2.59142	0.719097	-3.60372	0.000313691	0.0824438
AT3G57770		Protein kinase superfamily protein;(source:Araport11)	27	17	18	4	2	4	11.5095	-2.50274	0.793921	-3.15238	0.00161947	0.204832
AT2G46880	PURPLE ACID PHOSPHATASE 14 (PAP14)	purple acid phosphatase 14;(source:Araport11)	732	310	196	92	63	42	226.516	-2.47789	0.442455	-5.60032	2.14e-08	4.81e-05
AT4G31370	FASCICLIN-LIKE ARABINOGALACTAN PROTEIN 5 PRECURSOR (FLA5)	fasciclin-like arabinogalactan-protein, putative (FLA5)	155	35	11	7	14	14	36.4077	-2.35661	0.773173	-3.04797	0.00230394	0.245394
AT2G18130	PURPLE ACID PHOSPHATASE 11 (PAP11)	purple acid phosphatase 11;(source:Araport11)	733	278	235	100	94	29	232	-2.30568	0.477019	-4.83351	1.34e-06	0.00159691
AT4G19890		Pentatricopeptide repeat (PPR-like) superfamily protein;(source:Araport11)	17	17	14	5	2	2	9.25915	-2.28639	0.874775	-2.61369	0.00895715	0.492886
AT5G08030	GLYCEROPHOSPHODIESTER PHOSPHODIESTERASE 6 (GDPD6)	Encodes a member of the glycerophosphodiester phosphodiesterase (GDPD) family.	821	209	139	92	64	76	218.729	-2.14869	0.50309	-4.27098	1.95e-05	0.0101398
AT3G47040		Glycosyl hydrolase family protein;(source:Araport11)	14	24	23	4	4	5	12.1169	-2.14084	0.759393	-2.81915	0.0048151	0.359894
AT4G01360	BYPASS 3 (BPS3)	Encodes a protein related to BYPASS1 (BPS1). Regulates production of mobile compound: bps signal.	47	36	36	8	2	16	23.3166	-2.08293	0.653196	-3.18884	0.00142846	0.191442
AT1G08065	ALPHA CARBONIC ANHYDRASE 5 (ACA5)	alpha carbonic anhydrase 5;(source:Araport11)	121	75	264	67	24	18	92.5953	-1.91915	0.568956	-3.3731	0.000743277	0.130511
AT1G26610		C2H2-like zinc finger protein;(source:Araport11)	75	35	34	8	6	22	28.5731	-1.87702	0.608098	-3.0867	0.00202392	0.229535
AT4G36105		polyamine-modulated factor 1-binding protein;(source:Araport11)	44	24	12	4	8	8	15.8938	-1.8757	0.722167	-2.59733	0.00939525	0.502994
AT5G52020		encodes a member of the DREB subfamily A-4 of ERF/AP2 transcription factor family. The protein contains one AP2 domain. There are 17 members in this subfamily including TINY.	29	56	39	12	8	12	25.6975	-1.86312	0.565913	-3.29224	0.000993928	0.157142
AT5G64510	TUNICAMYCIN INDUCED 1 (TIN1)	Encodes Tunicamycin Induced 1(TIN1), a plant-speci_x001E_c ER stress-inducible protein. TIN1 mutation affects pollen surface morphology. Transcriptionally induced by treatment with the N-linked glyclsylation inhibitor tunicamycin.	90	69	48	11	4	42	42.3739	-1.76558	0.657598	-2.68488	0.0072555	0.456221
AT4G16160	(ATOEP16-2)	Homologous to pea OEP16 and barley pPORA (OEP16), a member of Arabidopsis OEP16 family. Two OEP16 genes are closely related to each other and are conserved in all land plants, OEP16-2, also named OEP16-S, and OEP16-1 (renamed OEP16-L) are result of the gene duplication event that occurred prior to divergence of bryophytes and seed plants. Predominantly expressed in seed and is not inducible by co…	84	36	34	4	11	27	30.9769	-1.76413	0.647613	-2.72405	0.00644861	0.437996
AT1G12610	DWARF AND DELAYED FLOWERING 1 (DDF1)	Encodes a member of the DREB subfamily A-1 of ERF/AP2 transcription factor family (DDF1). The protein contains one AP2 domain. There are six members in this subfamily, including CBF1, CBF2, and CBF3. Overexpression of this gene results in delayed flowering and dwarfism, reduction of gibberellic acid biosynthesis, and increased tolerance to high levels of salt. This gene is expressed in all tissue…	84	187	168	47	35	41	92.853	-1.74602	0.408898	-4.27007	1.95e-05	0.0101398
AT1G56240	PHLOEM PROTEIN 2-B13 (PP2-B13)	phloem protein 2-B13;(source:Araport11)	189	171	55	16	12	90	85.664	-1.73502	0.65554	-2.64671	0.00812794	0.468374
AT2G31210	BASIC HELIX LOOP HELIX PROTEIN 91 (BHLH091)	Encodes a bHLH transcription factor that together with bHLH089 and bHLH010 is important for the normal transcriptome of the developing Arabidopsis anther, possibly by forming a feed-forward loop with DYT1.	82	38	104	19	14	29	45.9362	-1.73109	0.492435	-3.51537	0.000439149	0.0965986
AT1G64580		Pentatricopeptide repeat (PPR) superfamily protein;(source:Araport11)	60	53	44	15	14	15	32.5782	-1.71982	0.452379	-3.80172	0.000143695	0.0476713
AT5G27220		Frigida-like protein;(source:Araport11)	65	45	80	12	26	18	39.6871	-1.65578	0.459915	-3.60019	0.000317988	0.0825017
AT1G09880		Rhamnogalacturonate lyase family protein;(source:Araport11)	62	42	212	22	30	42	66.4898	-1.65488	0.574367	-2.88122	0.0039614	0.322487
AT5G36260	(A36)	Eukaryotic aspartyl protease family protein;(source:Araport11)	50	38	31	16	6	14	25.1213	-1.59362	0.559807	-2.84673	0.00441711	0.346469
AT2G42960		Protein kinase superfamily protein;(source:Araport11)	51	52	67	23	18	11	36.2997	-1.58737	0.475098	-3.34114	0.000834354	0.141889
AT3G26125	CYTOCHROME P450, FAMILY 86, SUBFAMILY C, POLYPEPTIDE 2 (CYP86C2)	encodes a protein with cytochrome P450 domain	604	211	201	121	73	108	209.478	-1.58462	0.401976	-3.94207	8.08e-05	0.0302734
AT3G08900	REVERSIBLY GLYCOSYLATED POLYPEPTIDE 3 (RGP3)	RGP3 is a UDP-arabinose mutase that catalyzes the interconversion between the pyranose and furanose forms of UDP-L-arabinose. It is a reversibly autoglycosylated protein. Fluorescently-tagged RGP3 is found in the cytosol and associated with Golgi-like particles when expressed in tobacco leaves. An RGP3-YFP fusion protein under the control a native promoter can be found in the endosperm of Arabido…	558	905	584	270	141	227	442.42	-1.57779	0.325796	-4.84288	1.28e-06	0.00159691
AT3G58980		F-box family protein;(source:Araport11)	69	32	47	18	18	9	31.0121	-1.57226	0.519672	-3.02549	0.00248234	0.256969
AT4G01950	GLYCEROL-3-PHOSPHATE SN-2-ACYLTRANSFERASE 3 (GPAT3)	putative sn-glycerol-3-phosphate 2-O-acyltransferase	43	57	34	16	6	20	28.8317	-1.57125	0.566425	-2.77398	0.00553746	0.391824
AT1G74450		Plants overexpressing At1g74450 are stunted in height and have reduced male fertility.	201	170	67	21	19	99	92.7622	-1.57009	0.58724	-2.67367	0.00750254	0.460088
AT1G69500	CYTOCHROME P450, FAMILY 704, SUBFAMILY B, POLYPEPTIDE 1 (CYP704B1)	Encodes a cytochrome P450, designated CYP704B1. Expressed in the developing anthers. Essential for pollen exine development. Mutations in CYP704B1 result in impaired pollen walls that lack a normal exine layer and exhibit a characteristic striped surface, termed zebra phenotype. Heterologous expression of CYP704B1 in yeast cells demonstrated that it catalyzes omega-hydroxylation of long-chain fat…	353	189	858	210	91	136	299.095	-1.53982	0.478026	-3.22121	0.00127652	0.179395
AT1G28430	CYTOCHROME P450, FAMILY 705, SUBFAMILY A, POLYPEPTIDE 24 (CYP705A24)	member of CYP705A	461	217	100	52	65	129	162.588	-1.53359	0.474881	-3.22941	0.00124046	0.179309
AT3G21150	B-BOX DOMAIN PROTEIN 32 (BBX32)	Encodes a protein with a B-box domain predicted to act as a transcription factor. Expression of the BBX32 gene is affected by monochromatic red light. Genetic analysis shows BBX32 is under circadian control; it is a morning gene under clock regulation.	150	86	207	49	42	53	94.9515	-1.4984	0.370863	-4.0403	5.34e-05	0.0220473
AT5G17200		Pectin lyase-like superfamily protein;(source:Araport11)	47	37	78	29	11	12	35.0162	-1.49777	0.563339	-2.65873	0.00784351	0.465036
AT1G22810	(ATERF019)	encodes a member of the DREB subfamily A-5 of ERF/AP2 transcription factor family. The protein contains one AP2 domain. There are 16 members in this subfamily including RAP2.1, RAP2.9 and RAP2.10. Overexpression leands to delayed senescence and delayed flowering.	231	249	110	58	38	100	127.888	-1.49001	0.417847	-3.56591	0.000362594	0.0872022
AT2G17660		RPM1-interacting protein 4 (RIN4) family protein;(source:Araport11)	54	111	91	30	20	36	56.4893	-1.48784	0.449744	-3.3082	0.000938989	0.150812
AT1G75920		GDSL-motif esterase/acyltransferase/lipase. Enzyme group with broad substrate specificity that may catalyze acyltransfer or hydrolase reactions with lipid and non-lipid substrates. The mRNA is cell-to-cell mobile.	1952	923	448	403	320	378	706.983	-1.43897	0.387202	-3.71632	0.000202146	0.0592875
AT4G36550		ARM repeat superfamily protein;(source:Araport11)	100	56	44	12	20	37	43.0038	-1.42345	0.502274	-2.83401	0.00459676	0.356417
AT3G49810	U-BOX PROTEIN 30 (ATPUB30)	Encodes a protein with E3 ubiquitin ligase activity that is involved in negative regulation of salt stress tolerance during germination.	164	91	117	37	49	42	80.4813	-1.41355	0.327672	-4.31392	1.6e-05	0.00954629
AT4G24890	PURPLE ACID PHOSPHATASE 24 (PAP24)	purple acid phosphatase 24;(source:Araport11)	829	543	229	247	124	184	348.403	-1.37782	0.406733	-3.38753	0.000705256	0.12912
AT1G23060	MICROTUBULE DESTABILIZING PROTEIN 40 (MDP40)	hypothetical protein;(source:Araport11)	125	78	95	37	34	34	65.1667	-1.37688	0.340057	-4.04897	5.14e-05	0.0216884
AT5G53190	(SWEET3)	Nodulin MtN3 family protein;(source:Araport11)	186	62	204	62	26	72	98.4605	-1.3556	0.481322	-2.8164	0.00485646	0.359894
AT1G78070		Transducin/WD40 repeat-like superfamily protein;(source:Araport11)	253	144	376	114	78	85	170.607	-1.34666	0.364107	-3.69853	0.000216854	0.0626926
AT1G72830	NUCLEAR FACTOR Y, SUBUNIT A3 (NF-YA3)	Encodes a subunit of CCAAT-binding complex, binds to CCAAT box motif present in some plant promoter sequences. One of three members of this class (HAP2A, HAP2B, HAP2C), it is expressed in vegetative and reproductive tissues. Expression is upregulated in the shoot of cax1/cax3 mutant.	101	59	62	38	20	21	48.7736	-1.34189	0.442716	-3.03104	0.00243709	0.254409
AT1G56510	WHITE RUST RESISTANCE 4 (WRR4)	TIR-NB-LRR protein that confers resistance to four races of Albugo candida. The mRNA is cell-to-cell mobile.	274	207	161	54	46	136	141.69	-1.34113	0.396894	-3.37905	0.000727366	0.12912
AT4G28400		Protein phosphatase 2C family protein;(source:Araport11)	357	190	245	84	53	151	173.666	-1.33605	0.36859	-3.62476	0.000289228	0.0790961
AT1G49405	CASP-LIKE PROTEIN 5C3 (CASPL5C3)	Uncharacterized protein family (UPF0497);(source:Araport11)	74	59	71	28	22	25	45.4095	-1.32292	0.38474	-3.43849	0.000584973	0.114933
AT1G09950	RESPONSE TO ABA AND SALT 1 (RAS1)	RESPONSE TO ABA AND SALT 1;(source:Araport11)	206	284	188	66	87	103	153.018	-1.31761	0.300148	-4.38987	1.13e-05	0.0074042
AT1G73220	ORGANIC CATION/CARNITINE TRANSPORTER1 (OCT1)	Encodes Organic Cation Transporter 1 (OCT1), likely to be involved in polyamine transport.	1245	914	335	245	306	373	551.27	-1.31516	0.370175	-3.55281	0.000381147	0.0876508
AT5G44400	(ATBBE26)	FAD-binding Berberine family protein;(source:Araport11)	1149	597	204	190	267	257	425.819	-1.31265	0.432081	-3.03797	0.0023818	0.251044
AT1G66460		Protein kinase superfamily protein;(source:Araport11)	106	171	301	105	76	34	131.271	-1.3067	0.483222	-2.70414	0.00684812	0.445612
AT1G33430	UNEVEN PATTERN OF EXINE1 (UPEX1)	UPEX1 is arabinogalactan b-(1,3)-galactosyltransferase involved in the formation of pollen exine. Belongs to GT31 family. Mutants have reduced levels of AGPs.	2835	1547	2454	1007	594	948	1518.63	-1.28374	0.268054	-4.78912	1.68e-06	0.00188336
AT4G14815		Bifunctional inhibitor/lipid-transfer protein/seed storage 2S albumin superfamily protein;(source:Araport11)	2840	1849	1702	804	590	1060	1429.98	-1.25517	0.252854	-4.96404	6.9e-07	0.00107478
AT4G36350	PURPLE ACID PHOSPHATASE 25 (PAP25)	purple acid phosphatase 25;(source:Araport11)	1572	729	447	448	293	291	607.448	-1.24753	0.378192	-3.29865	0.000971493	0.154804
AT3G13190		WEB family protein (DUF827);(source:Araport11)	233	150	221	67	86	83	135.993	-1.23834	0.266305	-4.65008	3.32e-06	0.00319747
AT4G35985		Senescence/dehydration-associated protein-like protein;(source:Araport11)	96	131	106	19	36	80	76.3492	-1.23562	0.465085	-2.65676	0.0078896	0.465486
AT4G19140		exopolysaccharide production negative regulator;(source:Araport11)	127	55	134	38	36	49	70.779	-1.23337	0.398203	-3.09735	0.0019526	0.227096
AT3G45060	HIGH AFFINITY NITRATE TRANSPORTER 2.6 (NRT2.6)	member of High affinity nitrate transporter family	511	624	728	362	121	244	427.002	-1.23173	0.369807	-3.33072	0.000866212	0.14608
AT4G01430	USUALLY MULTIPLE ACIDS MOVE IN AND OUT TRANSPORTERS 29 (UMAMIT29)	Encodes a plasma membrane-localized amino acid transporter likely involved in amino acid export in the developing seed.	416	308	463	194	124	147	269.42	-1.2214	0.273343	-4.46839	7.88e-06	0.00569593
AT2G16750		kinase with adenine nucleotide alpha hydrolases-like domain-containing protein;(source:Araport11)	276	95	262	80	63	106	141.778	-1.20977	0.387086	-3.12532	0.00177612	0.219166
AT4G14560	INDOLE-3-ACETIC ACID INDUCIBLE 1 (IAA1)	auxin (indole-3-acetic acid) induced gene (IAA1) encoding a short-lived nuclear-localized transcriptional regulator protein. The mRNA is cell-to-cell mobile.	161	92	46	49	35	33	67.169	-1.20294	0.465651	-2.58334	0.00978483	0.509037
AT5G28470		Major facilitator superfamily protein;(source:Araport11)	702	619	513	293	193	251	419.802	-1.19047	0.244469	-4.86959	1.12e-06	0.00150875
AT3G48670	INVOLVED IN DE NOVO 2 (IDN2)	Encodes IDN2 (INVOLVED IN DE NOVO 2), a double-stranded RNA-binding protein involved in de novo methylation and small interfering RNA (siRNA)-mediated maintenance methylation. IND2 is a component of the RNA-directed DNA methylation pathway.	180	91	252	48	80	85	118.892	-1.18615	0.38513	-3.07986	0.00207099	0.229535
AT4G22780	ACT DOMAIN REPEAT 7 (ACR7)	Member of a family of ACT domain containing proteins . ACT domains are involved in amino acid binding .	1063	633	580	222	199	505	515.322	-1.18377	0.340107	-3.48057	0.00050034	0.104047
AT5G22690		Disease resistance protein (TIR-NBS-LRR class) family;(source:Araport11)	90	79	93	26	31	51	60.1399	-1.1781	0.366712	-3.21261	0.00131536	0.182322
AT1G48300	DIACYLGLYCEROL ACYLTRANSFERASE 3 (DGAT3)	diacylglycerol acyltransferase;(source:Araport11)	711	482	498	196	272	221	385.446	-1.17579	0.214826	-5.47324	4.42e-08	8.13e-05
AT1G26130		ATPase E1-E2 type family protein / haloacid dehalogenase-like hydrolase family protein;(source:Araport11)	108	75	182	51	38	61	83.8992	-1.16737	0.40076	-2.9129	0.00358094	0.310873
AT1G76650	CALMODULIN-LIKE 38 (CML38)	calmodulin-like 38;(source:Araport11)	395	367	198	131	64	201	220.849	-1.16675	0.397244	-2.93712	0.00331279	0.297481
AT1G52690	LATE EMBRYOGENESIS ABUNDANT 7 (LEA7)	Late embryogenesis abundant protein (LEA) family protein;(source:Araport11)	569	316	677	286	235	109	357.151	-1.16153	0.377083	-3.08031	0.00206786	0.229535
AT3G13430		RING/U-box superfamily protein;(source:Araport11)	116	68	106	44	27	48	66.3306	-1.15601	0.375826	-3.07593	0.00209847	0.230798
AT4G36640		Sec14p-like phosphatidylinositol transfer family protein;(source:Araport11)	281	225	324	84	111	153	191.356	-1.15228	0.271481	-4.24442	2.19e-05	0.0108172
AT4G13750	NO VEIN (NOV)	Encodes NO VEIN (NOV), a plant-specific nuclear factor required for leaf vascular development, cellular patterning and stem cell maintenance in the root meristem, as well as for cotyledon outgrowth and separation. nov mutations affect many aspects of auxin-dependent development without directly affecting auxin perception.	82	57	84	24	30	40	51.3921	-1.13641	0.377629	-3.00933	0.00261822	0.264345
AT4G33740		myb-like protein X;(source:Araport11)	139	97	253	88	42	74	113.345	-1.1329	0.424764	-2.66712	0.00765047	0.462157
AT4G32500	K+ TRANSPORTER 5 (KT5)	Encodes AKT5, a member of the Shaker family potassium ion (K+) channel. This family includes five groups based on phylogenetic analysis (FEBS Letters (2007) 581: 2357): I (inward rectifying channel): AKT1 (AT2G26650), AKT5 (AT4G32500) and SPIK (also known as AKT6, AT2G25600); II (inward rectifying channel): KAT1 (AT5G46240) and KAT2 (AT4G18290); III (weakly inward rectifying channel): AKT2 (AT4G2…	280	180	90	72	86	74	126.348	-1.11461	0.379782	-2.93487	0.00333687	0.297481
AT1G63860		Disease resistance protein (TIR-NBS-LRR class) family;(source:Araport11)	163	150	98	46	49	82	95.6487	-1.11243	0.34531	-3.22156	0.00127496	0.179395
AT3G16460	JACALIN-RELATED LECTIN 34 (JAL34)	Mannose-binding lectin superfamily protein;(source:Araport11)	288	385	328	224	58	142	235.849	-1.11224	0.422184	-2.63448	0.00842665	0.476341
AT4G31800	WRKY DNA-BINDING PROTEIN 18 (WRKY18)	Pathogen-induced transcription factor. Binds W-box sequences in vitro. Forms protein complexes with itself and with WRKY40 and WRKY60. Constitutive expression of WRKY18 enhanced resistance to P. syringae, but its coexpression with WRKY40 or WRKY60 made plants more susceptible to both P. syringae and B. cinerea. WRKY18, WRKY40, and WRKY60 have partially redundant roles in response to the hemibiotr…	731	638	775	226	197	506	499.64	-1.11111	0.317513	-3.49941	0.000466293	0.0993301
AT5G16830	SYNTAXIN OF PLANTS 21 (SYP21)	member of SYP2 Gene Family. Over-expression of the gene in tobacco protoplasts leads to a disruption of vacuolar transport from the prevacuolar compartment (PVC) to the vacuole, but not from the Golgi apparatus to the plasma membrane.	321	179	297	117	100	124	184.473	-1.09586	0.272032	-4.02843	5.62e-05	0.0226995
AT4G30990		ARM repeat superfamily protein;(source:Araport11)	129	91	196	37	73	72	97.0494	-1.09374	0.37995	-2.87863	0.00399405	0.32331
AT1G23560		OBP32pep, putative (DUF220);(source:Araport11)	1328	791	1063	538	318	505	737.799	-1.08794	0.261229	-4.1647	3.12e-05	0.0137155
AT1G76890	(GT2)	encodes a plant trihelix DNA-binding protein	244	117	116	68	76	63	110.223	-1.06388	0.340835	-3.1214	0.00179995	0.219432
AT5G17340		Putative membrane lipoprotein;(source:Araport11)	443	276	116	139	105	118	193.74	-1.06189	0.401676	-2.64366	0.00820146	0.469472
AT1G77210	SUGAR TRANSPORT PROTEIN 14 (STP14)	AtSTP14 belongs to the family of sugar transport proteins (AtSTPs)in volved in monosaccharide transport. Heterologous expression in yeast revealed that AtSTP14 is the transporter specifc for galactose and does not transport other monosaccharides such as glucose or fructose.	547	528	560	296	192	233	386.503	-1.05919	0.24304	-4.35809	1.31e-05	0.00829734
AT2G27740		RAB6-interacting golgin (DUF662);(source:Araport11)	199	141	118	61	92	49	107.171	-1.05776	0.336795	-3.14067	0.00168563	0.210415
AT5G44630		Encodes a sesquiterpene synthase involved in generating all of the group B sesquiterpenes found in the Arabidopsis floral volatile blend. Strongly expressed in intrafloral nectaries.	184	102	121	42	79	59	94.6898	-1.0572	0.33577	-3.14859	0.00164061	0.206217
AT1G22015	(DD46)	Galactosyltransferase family protein;(source:Araport11)	661	357	198	195	146	192	282.197	-1.04405	0.364834	-2.86171	0.00421359	0.335711
AT1G25210	LIPID X C5 (LPXC5)	UDP-3-O-acyl N-acetylglycosamine deacetylase family protein;(source:Araport11)	199	172	238	59	136	82	144.273	-1.03764	0.326446	-3.17859	0.00147993	0.19448
AT3G22420	WITH NO LYSINE (K) KINASE 2 (WNK2)	Encodes a member of the WNK family (9 members in all) of protein kinases, the structural design of which is clearly distinct from those of other known protein kinases, such as receptor-like kinases and mitogen-activated protein kinases. Its transcription is under the control of circadian rhythms.	157	56	117	48	50	48	76.6376	-1.03476	0.388324	-2.66468	0.00770618	0.462759
AT4G00040		Chalcone and stilbene synthase family protein;(source:Araport11)	7632	6774	3557	3027	2178	2905	4258.63	-1.02351	0.280097	-3.65411	0.000258074	0.0725367
AT1G23000		Heavy metal transport/detoxification superfamily protein;(source:Araport11)	176	98	144	54	36	100	98.2934	-1.01874	0.392843	-2.59325	0.00950731	0.50365
AT5G27120		SAR DNA-binding protein, putative, strong similarity to SAR DNA-binding protein-1 (Pisum sativum) GI:3132696; contains Pfam profile PF01798: Putative snoRNA binding domain; has similarity to MAR binding NOP58 protein The mRNA is cell-to-cell mobile.	565	246	387	137	194	211	279.946	-1.01684	0.287065	-3.54219	0.000396815	0.089226
AT5G40160	EMBRYO DEFECTIVE 506 (EMB506)	Encodes ankyrin repeat protein EMB506. Mutations in this locus result in embryo lethality.	109	116	86	34	52	58	74.3046	-1.01483	0.337324	-3.00848	0.00262555	0.264345
AT5G61640	PEPTIDEMETHIONINE SULFOXIDE REDUCTASE 1 (PMSR1)	ubiquitous enzyme that repairs oxidatively damaged proteins	359	216	172	112	130	95	175.57	-1.01419	0.305275	-3.32221	0.000893063	0.147297
AT1G77220		organic solute transporter ostalpha protein (DUF300);(source:Araport11)	141	68	98	44	46	49	72.0458	-1.01092	0.347191	-2.9117	0.00359462	0.310873
AT3G29290	EMBRYO DEFECTIVE 2076 (emb2076)	Pentatricopeptide repeat (PPR) superfamily protein;(source:Araport11)	150	94	84	48	55	47	77.4966	-1.00096	0.33358	-3.00065	0.00269408	0.265952
AT4G29250		HXXXD-type acyl-transferase family protein;(source:Araport11)	1900	1938	1772	1073	574	938	1346.34	-0.996812	0.259884	-3.83561	0.000125255	0.0429625
AT2G03470		ELM2 domain-containing protein;(source:Araport11)	396	177	363	131	129	169	220.592	-0.996002	0.300049	-3.31947	0.000901896	0.147297
AT5G07530	GLYCINE RICH PROTEIN 17 (GRP17)	encodes a glycine-rich protein that has oleosin domain and is expressed specifically during flower stages 10 to 12. Protein is found on mature pollen coat.	12164	8365	4057	3225	4231	3888	5817.87	-0.992066	0.306442	-3.23737	0.00120638	0.178201
AT2G21590	(APL4)	Encodes the large subunit of ADP-glucose pyrophosphorylase, the enzyme which catalyzes the first and limiting step in starch biosynthesis. The large subunit plays a regulatory role whereas the small subunit (ApS) is the catalytic isoform. Four isoforms of the large subunit (ApL1-4) have been described.	85	59	101	26	40	49	58.4413	-0.98635	0.381723	-2.58394	0.00976781	0.509037
AT4G11330	MAP KINASE 5 (MPK5)	MAP kinase	206	108	136	76	48	84	106.583	-0.977151	0.340115	-2.873	0.00406591	0.326515
AT1G12420	ACT DOMAIN REPEAT 8 (ACR8)	ACT domain repeat 8;(source:Araport11)	115	63	132	39	51	56	73.9249	-0.969754	0.363491	-2.66789	0.00763292	0.462157
AT2G21890	CINNAMYL ALCOHOL DEHYDROGENASE HOMOLOG 3 (CAD3)	cinnamyl alcohol dehydrogenase homolog 3;(source:Araport11)	212	180	108	97	80	57	120.154	-0.963335	0.354338	-2.71869	0.00655409	0.437996
AT5G26730		Fasciclin-like arabinogalactan family protein;(source:Araport11)	2631	3047	4451	2197	930	1673	2465.11	-0.955767	0.330542	-2.89152	0.00383384	0.321121
AT5G63790	NAC DOMAIN CONTAINING PROTEIN 102 (NAC102)	Encodes a member of the NAC family of transcription factors. ANAC102 appears to have a role in mediating response to low oxygen stress (hypoxia) in germinating seedlings.	789	505	532	247	226	395	436.615	-0.954702	0.255816	-3.73199	0.000189975	0.0591466
AT3G54000		TIP41-like protein;(source:Araport11)	522	522	316	154	176	330	329.317	-0.949844	0.316843	-2.99784	0.00271898	0.266047
AT2G46690	SMALL AUXIN UPREGULATED RNA 32 (SAUR32)	SAUR-like auxin-responsive protein family;(source:Araport11)	180	159	109	74	61	79	108.178	-0.948634	0.306844	-3.09158	0.00199091	0.229535
AT3G03305		Calcineurin-like metallo-phosphoesterase superfamily protein;(source:Araport11)	723	389	281	176	212	275	331.307	-0.943149	0.315151	-2.99269	0.0027653	0.267757
AT3G24520	HEAT SHOCK TRANSCRIPTION FACTOR C1 (HSFC1)	member of Heat Stress Transcription Factor (Hsf) family	160	99	167	58	80	67	102.536	-0.937387	0.305197	-3.07142	0.00213042	0.233045
AT1G18800	NAP1-RELATED PROTEIN 2 (NRP2)	Double nrp1-1 nrp2-1 mutants show arrest of cell cycle progression at G2/M and disordered cellular organization occurred in root tips. Localize in the nucleus and can form homomeric and heteromeric protein complexes with NRP1. Bind histones Histone2A and Histone2B and associate with chromatin in vivo. Plant mutated in both NRP1 and NRP2 genes show hypersensitivity to genotoxic stresses including …	566	357	424	229	215	199	323.782	-0.935908	0.222451	-4.20726	2.58e-05	0.0118886
AT2G15240		UNC-50 family protein;(source:Araport11)	227	173	137	96	72	90	129.711	-0.931034	0.292583	-3.18212	0.00146202	0.19448
AT1G20823	(ATATL80)	Encodes a RING E3 ubiquitin ligase ATL80. Involved in phosphate mobilization and cold stress response in sufficient phosphate growth conditions. The mRNA is cell-to-cell mobile.	884	1006	663	312	270	679	623.816	-0.929979	0.329323	-2.82391	0.00474419	0.359894
AT1G21000		PLATZ transcription factor family protein;(source:Araport11)	143	79	185	67	66	63	98.1841	-0.92834	0.353413	-2.62679	0.00861949	0.484535
AT4G18190	PURINE PERMEASE 6 (PUP6)	Member of a family of proteins related to PUP1, a purine transporter. May be involved in the transport of purine and purine derivatives such as cytokinins, across the plasma membrane.	994	1130	1714	862	398	591	939.929	-0.928152	0.329159	-2.81977	0.00480588	0.359894
AT1G20132		GDSL-motif esterase/acyltransferase/lipase. Enzyme group with broad substrate specificity that may catalyze acyltransfer or hydrolase reactions with lipid and non-lipid substrates.	571	384	248	180	202	200	289.649	-0.921227	0.285956	-3.22156	0.00127493	0.179395
AT5G16960		Zinc-binding dehydrogenase family protein;(source:Araport11)	11109	8906	7613	5350	3338	4650	6700.28	-0.920206	0.233764	-3.93647	8.27e-05	0.0304252
AT3G54860	(ATVPS33)	Homologous to yeast VPS33. Forms a complex with VCL1 and AtVPS11. Involved in vacuolar biogenesis.	155	83	104	46	44	76	82.1073	-0.920073	0.352048	-2.61349	0.00896231	0.492886
AT2G22300	SIGNAL RESPONSIVE 1 (SR1)	Encodes a putative CAM binding transcription factor. Loss of function mutations show enhanced resistance to fungal and bacterial pathogens suggesting that CAMTA functions to suppress defense responses.It acts in the cold response pathway, it can bind to and activate the expression of DREB1 genes.	155	140	237	65	86	112	129.834	-0.918846	0.318966	-2.8807	0.00396795	0.322487
AT3G50580		transmembrane protein;(source:Araport11)	962	967	581	510	209	502	612.81	-0.917413	0.347539	-2.63974	0.00829685	0.471638
AT3G22235		cysteine-rich TM module stress tolerance protein;(source:Araport11)	94	78	95	37	51	43	64.9585	-0.917213	0.324335	-2.82798	0.00468428	0.359227
AT1G10650		SBP (S-ribonuclease binding protein) family protein;(source:Araport11)	156	120	214	75	88	79	119.61	-0.904705	0.30196	-2.99611	0.00273448	0.266047
AT1G63980		D111/G-patch domain-containing protein;(source:Araport11)	460	231	386	159	166	202	259.765	-0.903753	0.261336	-3.45821	0.00054378	0.10879
AT4G02560	LUMINIDEPENDENS (LD)	Encodes a nuclear localized protein with similarity to transcriptional regulators. Recessive mutants are late flowering. Expression of LFY is reduced in LD mutants. LD has been reported to exhibit prion like behavior in yeast but it remains to be determined if such activity exists during normal plant development.	157	97	175	46	86	81	104.118	-0.902674	0.336227	-2.68472	0.00725909	0.456221
AT1G26710		transmembrane protein;(source:Araport11)	1540	1237	552	523	523	592	808.902	-0.902063	0.311919	-2.89198	0.00382819	0.321121
AT1G71160	3-KETOACYL-COA SYNTHASE 7 (KCS7)	Encodes KCS7, a member of the 3-ketoacyl-CoA synthase family involved in the biosynthesis of VLCFA (very long chain fatty acids).	940	586	904	444	281	464	589.768	-0.901104	0.260739	-3.45596	0.00054833	0.10879
AT4G36080		phosphotransferases/inositol or phosphatidylinositol kinase;(source:Araport11)	437	372	424	152	206	260	301.688	-0.894696	0.224387	-3.9873	6.68e-05	0.0260083
AT1G11960		ERD (early-responsive to dehydration stress) family protein;(source:Araport11)	628	700	689	252	269	513	499.406	-0.875462	0.275972	-3.17229	0.00151243	0.196199
AT4G24400	CBL-INTERACTING PROTEIN KINASE 8 (CIPK8)	Encodes a CBL (calcineurin B-like calcium sensor proteins) -interacting serine/threonine protein kinase. Regulates the low-affinity phase of the primary nitrate response. The mRNA is cell-to-cell mobile.	123	86	124	51	45	72	81.608	-0.872134	0.324428	-2.68822	0.00718339	0.456221
AT4G20050	QUARTET 3 (QRT3)	Encodes a polygalacturonase that plays a direct role in degrading the pollen mother cell wall during microspore development.	2491	2393	2817	1601	968	1302	1903.42	-0.869473	0.238269	-3.64913	0.000263134	0.0729459
AT1G03970	G-BOX BINDING FACTOR 4 (GBF4)	encodes a basic leucine zipper G-box binding factor that can bind to G-box motifs only as heterodimers with GBF2 or GBF3. A single amino acid change can confer G-box binding as homodimers.	267	194	191	73	146	114	159.95	-0.861522	0.286845	-3.00344	0.00266944	0.265952
AT5G52180		transmembrane protein 161AB protein;(source:Araport11)	205	136	120	62	86	86	112.765	-0.860446	0.294696	-2.91977	0.00350284	0.305548
AT1G31460		vitellogenin-2 protein;(source:Araport11)	222	132	154	91	73	92	124.242	-0.857531	0.285331	-3.00539	0.00265238	0.265724
AT3G50570		hydroxyproline-rich glycoprotein family protein;(source:Araport11)	2236	1752	1074	985	631	946	1245.46	-0.852245	0.283959	-3.00129	0.00268837	0.265952
AT3G54280	ROOT GROWTH DEFECTIVE 3 (RGD3)	ROOT GROWTH DEFECTIVE 3;(source:Araport11)	291	174	273	101	140	136	181.056	-0.851858	0.259413	-3.28379	0.00102423	0.159441
AT5G55970		RING/U-box superfamily protein;(source:Araport11)	734	369	326	225	182	314	347.213	-0.851604	0.31396	-2.71246	0.00667857	0.439913
AT4G09340		SPla/RYanodine receptor (SPRY) domain-containing protein;(source:Araport11)	125	115	155	60	63	81	98.0511	-0.847798	0.293385	-2.88971	0.00385593	0.321121
AT1G70200	(RBD1)	Encodes a RNA-Binding Protein RBD1. Promotes chilling tolerance through 23S rRNA processing.	262	119	180	95	111	77	136.702	-0.847503	0.319481	-2.65275	0.00798387	0.466964
AT4G13630		zein-binding protein (Protein of unknown function, DUF593);(source:Araport11)	159	103	111	65	52	73	91.6376	-0.847332	0.306582	-2.7638	0.00571322	0.402851
AT1G08630	THREONINE ALDOLASE 1 (THA1)	Encodes a threonine aldolase, involved in threonine degradation to glycine. Primarily expressed in seeds and seedlings.	453	238	192	127	159	165	215.463	-0.837881	0.307671	-2.7233	0.00646338	0.437996
AT1G19990		nucleolin;(source:Araport11)	178	142	160	64	78	108	118.94	-0.83494	0.27606	-3.02448	0.00249058	0.256969
AT5G50680	SUMO ACTIVATING ENZYME 1B (SAE1B)	Encodes a protein that is part of a heterodimeric SUMO E1 activating enzyme.	784	396	477	326	324	188	405.407	-0.834926	0.303586	-2.75021	0.00595572	0.417045
AT4G20320		CTP synthase family protein;(source:Araport11)	2744	1577	1840	690	1092	1426	1514.47	-0.829689	0.25582	-3.24325	0.00118174	0.175844
AT1G30020		hypothetical protein (Protein of unknown function, DUF538);(source:Araport11)	1729	1268	1054	750	523	831	1004.24	-0.818844	0.243031	-3.36929	0.000753614	0.130511
AT3G44630		Disease resistance protein (TIR-NBS-LRR class) family;(source:Araport11)	459	436	533	174	214	373	357.461	-0.815992	0.277916	-2.93611	0.00332353	0.297481
AT3G19970		alpha/beta-Hydrolases superfamily protein;(source:Araport11)	227	162	236	93	98	138	155.466	-0.814068	0.265403	-3.06728	0.00216014	0.235025
AT4G22755		methylsterol monooxygenase 1-3;(source:Araport11)	1225	698	756	521	379	485	661.015	-0.812588	0.244835	-3.31892	0.000903672	0.147297
AT1G35470	RAN-BINDING PROTEIN IN THE MICROTUBULE-ORGANIZING CENTRE (RANBPM)	Encodes a homologue of human RanBPM that belongs to the uncharacterized family of plant SPRY, LisH, CTLH and CRA domain-containing proteins.	231	112	145	84	85	84	120.067	-0.811392	0.304382	-2.6657	0.00768277	0.462727
AT3G59060	PHYTOCHROME INTERACTING FACTOR 3-LIKE 6 (PIL6)	Encodes a novel Myc-related bHLH transcription factor, which physically associated with APRR1/TOC1 and is a member of PIF3 transcription factor family. Involved in shade avoidance. Functions as negative regulator of PhyB. Protein levels are modulated by phytochrome B.	218	172	229	111	130	84	154.585	-0.809391	0.273883	-2.95525	0.00312416	0.28738
AT5G55720		Pectin lyase-like superfamily protein;(source:Araport11)	566	349	321	203	226	220	306.254	-0.801536	0.239774	-3.34287	0.000829159	0.141889
AT3G15510	NAC DOMAIN CONTAINING PROTEIN 2 (NAC2)	Note of caution: not to be confused with another protein (AtNAC6 locus AT5G39610) which on occasion has also been referred to as AtNAC2.	1086	776	439	400	354	457	571.695	-0.799382	0.292251	-2.73526	0.00623311	0.429046
AT2G27310		F-box family protein;(source:Araport11)	441	578	439	217	214	357	369.437	-0.798777	0.269577	-2.96307	0.00304587	0.281594
AT5G08790	(ATAF2)	induced by wounding, belongs to a large family of putative transcriptional activators with NAC domain.	1677	1306	1248	650	588	1015	1056.97	-0.798109	0.22744	-3.5091	0.000449621	0.0978386
AT4G24480		Protein kinase superfamily protein;(source:Araport11)	574	420	527	295	203	305	380.042	-0.797046	0.235594	-3.38313	0.000716642	0.12912
AT5G12940		Leucine-rich repeat (LRR) family protein;(source:Araport11)	864	1208	879	464	496	636	749.51	-0.796938	0.235699	-3.38116	0.000721793	0.12912
AT5G09450		Tetratricopeptide repeat (TPR)-like superfamily protein;(source:Araport11)	132	105	123	44	77	72	90.0916	-0.795208	0.304448	-2.61197	0.00900234	0.492886
AT3G56360		hypothetical protein;(source:Araport11)	1279	1759	952	760	895	484	1013.62	-0.794749	0.307348	-2.58583	0.00971451	0.507991
AT5G10150		UPSTREAM OF FLC protein (DUF966);(source:Araport11)	174	138	165	60	90	107	119.577	-0.788713	0.279996	-2.81687	0.00484945	0.359894
AT4G20460		NAD(P)-binding Rossmann-fold superfamily protein;(source:Araport11)	348	165	206	131	124	123	177.799	-0.787038	0.289755	-2.71622	0.00660314	0.437996
AT3G45010	SERINE CARBOXYPEPTIDASE-LIKE 48 (scpl48)	serine carboxypeptidase-like 48;(source:Araport11)	2626	1353	1684	1070	786	1131	1404.44	-0.783631	0.246535	-3.17858	0.00147996	0.19448
AT1G04300	(MUSE13)	Encodes MUSE13, a TRAF domain protein. Regulates the turnover of nucleotide-binding domain and leucine-rich repeat-containing (NLR) immune receptors SNC1 and RPS2. Loss of both MUSE13 and MUSE14 leads to enhanced pathogen resistance, NLR accumulation, and autoimmunity.In addition, MUSE13/14 physically interact with ATG6 and appear to regulate ATG6 ubiquitination and thus formation of autophagosom…	283	218	308	103	147	188	203.172	-0.782753	0.263276	-2.97312	0.00294789	0.278769
AT3G42950		Pectin lyase-like superfamily protein;(source:Araport11)	1568	1602	1397	982	657	811	1155.7	-0.778619	0.225025	-3.46015	0.000539883	0.10879
AT1G02520	ATP-BINDING CASSETTE B11 (ABCB11)	Encodes an ATP-binding cassette (ABC) transporter. Expressed in the vascular tissue of primary stem. The mRNA is cell-to-cell mobile.	558	535	469	282	204	363	395.384	-0.769824	0.248122	-3.10261	0.00191825	0.227096
AT1G28420	HOMEOBOX-1 (HB-1)	homeobox-1;(source:Araport11)	176	152	173	73	85	116	126.621	-0.766027	0.265842	-2.88151	0.0039577	0.322487
AT2G20470		AGC (cAMP-dependent, cGMP-dependent and protein kinase C) kinase family protein;(source:Araport11)	239	207	371	159	121	164	207.115	-0.765271	0.296978	-2.57686	0.00997011	0.514041
AT2G16910	ABORTED MICROSPORES (AMS)	Encodes a basic helix-loop helix transcription factor involved in tapetal cell development, that directly regulates MGT5 expression in tapetum cells. Loss of function mutations are male sterile. AMS binds to a region termed the E box of target gene promoters.	1119	1233	1261	727	529	714	919.915	-0.764303	0.216675	-3.52742	0.000419635	0.0933203
AT1G13160		ARM repeat superfamily protein;(source:Araport11)	186	141	175	70	90	115	126.632	-0.760809	0.269101	-2.82723	0.00469527	0.359227
AT3G15540	INDOLE-3-ACETIC ACID INDUCIBLE 19 (IAA19)	Primary auxin-responsive gene. Involved in the regulation stamen filaments development.	360	210	295	118	177	176	216.809	-0.760283	0.25368	-2.99702	0.00272631	0.266047
AT5G24030	SLAC1 HOMOLOGUE 3 (SLAH3)	Encodes a protein with ten predicted transmembrane helices. The SLAH3 protein has similarity to the SLAC1 protein involved in ion homeostasis in guard cells. Although it is not expressed in guard cells, it can complement an slac1-2 mutant suggesting that it performs a similar function. SLAH3:GFP localizes to the plasma membrane.	473	498	372	202	198	342	341.631	-0.758776	0.265083	-2.86241	0.00420436	0.335711
AT4G18950		Integrin-linked protein kinase family;(source:Araport11)	544	345	565	197	262	341	366.48	-0.7524	0.253209	-2.97146	0.00296384	0.278973
AT3G57300	INO80 ORTHOLOG (INO80)	Encodes the Arabidopsis INO80 ortholog of the SWI/SNF ATPase family that has been shown to interact with H2A.Z and facilitates the enrichment of H2A.Z at the ends of the flowering repressor genes FLC and MAF4/5. Functions as a positive regulator of DNA homologous recombination (HR) and plays a crucial role in genome stability maintenance. In INO80 mutants, the HR frequency is reduced to 15% of th…	330	208	400	141	155	220	236.82	-0.750311	0.285028	-2.63241	0.00847818	0.477919
AT1G74540	CYTOCHROME P450, FAMILY 98, SUBFAMILY A, POLYPEPTIDE 8 (CYP98A8)	Encodes a tricoumaroylspermidine / triferuloylspermidine meta-hydroxylase that participates in the formation of N<sup>1</sup>,N<sup>5</sup>-di(hydroxyferuloyol)- N<sup>10</sup>-sinapoyl spermidine, an important constituent of pollen. This gene appears to be expressed in young flower buds and inflorescence tips with notably high levels of expression in the tapetum and pollen.	9744	9764	5603	5238	3330	5250	6400.22	-0.743866	0.273749	-2.71733	0.00658119	0.437996
AT4G37900	(ATGRDP2)	Protein of unknown function that contains DUF1399 domain and putative RNA binding motif. Expressed in many plant tissues and is involved in many aspects of plant growth and development as well as response to salt stress.	13005	9857	6510	5460	4627	6024	7425.16	-0.741841	0.240921	-3.07919	0.00207565	0.229535
AT5G61340		transmembrane protein;(source:Araport11)	283	253	189	106	126	173	184.571	-0.735862	0.267692	-2.74892	0.00597922	0.417247
AT4G26490		Late embryogenesis abundant (LEA) hydroxyproline-rich glycoprotein family;(source:Araport11)	156	164	143	95	80	82	118.589	-0.735734	0.273954	-2.68561	0.00723982	0.456221
AT2G28930	PROTEIN KINASE 1B (PK1B)	protein kinase 1B;(source:Araport11)	204	123	160	68	92	110	122.895	-0.735394	0.284249	-2.58715	0.00967728	0.507355
AT2G21730	CINNAMYL ALCOHOL DEHYDROGENASE HOMOLOG 2 (CAD2)	cinnamyl alcohol dehydrogenase homolog 2;(source:Araport11)	217	199	230	113	91	157	165.056	-0.732035	0.271037	-2.70087	0.00691586	0.448578
AT5G46520	VARIATION IN COMPOUND TRIGGERED ROOT GROWTH RESPONSE (VICTR)	VICTR (VARIATION IN COMPOUND TRIGGERED ROOT growth response) encodes a TIR-NB-LRR (for Toll-Interleukin1 Receptor-nucleotide binding-Leucine-rich repeat) protein. VICTR is necessary for DFPM-induced root growth arrest and inhibition of abscisic acid-induced stomatal closing (DFPM is [5-(3,4-dichlorophenyl)furan-2-yl]-piperidine-1-ylmethanethione)(PMID:21620700). DFPM-mediated root growth arrest i…	361	303	333	112	199	251	253.951	-0.731983	0.274151	-2.67	0.00758518	0.460965
AT4G39540	SHIKIMATE KINASE 2 (SK2)	Encodes a shikimate kinase. Its transcripts appear to be expressed in vegetative tissues and developing embryos. SK2 transcript levels rise in response to Phytophthora infestans spores. SK2 is believed to be localized to the chloroplast.	234	139	206	117	96	106	146.57	-0.728891	0.273951	-2.66066	0.00779867	0.464786
AT1G78200		Protein phosphatase 2C family protein;(source:Araport11)	175	110	153	69	81	94	111.005	-0.726431	0.277969	-2.61336	0.00896575	0.492886
AT2G26990	FUSCA 12 (FUS12)	Represses photomorphogenesis and induces skotomorphogenesis in the dark.	286	157	235	136	110	129	171.599	-0.720725	0.272836	-2.64161	0.00825135	0.470373
AT1G51700	DOF ZINC FINGER PROTEIN 1 (DOF1)	Encodes dof zinc finger protein (adof1). The mRNA is cell-to-cell mobile.	854	701	537	312	344	523	533.48	-0.720332	0.245369	-2.93571	0.00332781	0.297481
AT4G30470		NAD(P)-binding Rossmann-fold superfamily protein;(source:Araport11)	1389	1167	1914	1068	630	785	1145.32	-0.719365	0.27639	-2.60272	0.00924874	0.496576
AT3G26618	EUKARYOTIC RELEASE FACTOR 1-3 (ERF1-3)	eukaryotic release factor 1-3;(source:Araport11)	378	196	231	139	148	160	203.129	-0.716905	0.264382	-2.71163	0.00669532	0.439913
AT5G46510	VARIATION IN COMPOUND TRIGGERED ROOT GROWTH RESPONSE-LIKE (VICTL)	Disease resistance protein (TIR-NBS-LRR class) family;(source:Araport11)	498	405	562	176	304	359	375.672	-0.707986	0.260746	-2.71524	0.00662286	0.437996
AT2G14110		Haloacid dehalogenase-like hydrolase (HAD) superfamily protein;(source:Araport11)	202	181	143	102	109	86	135.057	-0.706904	0.270773	-2.61069	0.00903596	0.492886
AT3G50760	GALACTURONOSYLTRANSFERASE-LIKE 2 (GATL2)	Encodes a protein with putative galacturonosyltransferase activity. The mRNA is cell-to-cell mobile.	302	316	231	158	133	193	219.07	-0.703779	0.256152	-2.74751	0.00600505	0.417609
AT5G65205		NAD(P)-binding Rossmann-fold superfamily protein;(source:Araport11)	1608	1044	979	672	566	805	924.393	-0.7029	0.223919	-3.13908	0.0016948	0.210415
AT2G43240		Nucleotide-sugar transporter family protein;(source:Araport11)	420	260	414	215	163	239	279.389	-0.700335	0.257708	-2.71755	0.00657676	0.437996
AT1G74130		Rhomboid-related intramembrane serine protease family protein;(source:Araport11)	717	931	935	552	409	519	671.994	-0.69785	0.239811	-2.91	0.00361431	0.311246
AT5G14760	L-ASPARTATE OXIDASE (AO)	At5g14760 encodes for L-aspartate oxidase involved in the early steps of NAD biosynthesis. In contrary to the EC 1.4.3.16 (l-aspartate oxidase - deaminating) the enzyme catalyzes the reaction L-aspartate + O2 = iminoaspartate (alpha-iminosuccinate) + H2O2	1067	1000	808	573	473	594	741.504	-0.694554	0.202304	-3.43323	0.000596444	0.115437
AT1G75940	(ATA27)	encodes a protein similar to the BGL4 beta-glucosidase from Brassica napus. The ATA27 protein is predicted to have an ER retention signal and an acidic isoelectric point, suggesting that it may be localized to the ER lumen.	21260	11428	12003	8174	7478	9504	11341.9	-0.694495	0.225061	-3.08581	0.00202997	0.229535
AT1G35180		TRAM, LAG1 and CLN8 (TLC) lipid-sensing domain containing protein;(source:Araport11)	272	208	176	125	124	124	168.283	-0.692797	0.247782	-2.79599	0.00517407	0.375297
AT1G62430	CDP-DIACYLGLYCEROL SYNTHASE 1 (CDS1)	Encodes a CDP-diacylglycerol synthase, involved in phospholipid biosynthesis.	468	296	281	199	171	222	266.725	-0.691256	0.247618	-2.79162	0.00524443	0.379041
AT3G02200		Proteasome component (PCI) domain protein;(source:Araport11)	999	522	624	388	417	408	545.436	-0.688402	0.230143	-2.99119	0.00277889	0.267792
AT1G20450	EARLY RESPONSIVE TO DEHYDRATION 10 (ERD10)	Encodes a gene induced by low temperature and dehydration. Inhibits e.coli growth while overexpressed. Belongs to the dehydrin protein family, which contains highly conserved stretches of 7-17 residues that are repetitively scattered in their sequences, the K-, S-, Y- and lysine rich segments. LTI29 and LTI30 double overexpressors confer cold tolerance. Localized to membranes and cytoplasm.	4145	2775	4784	2772	1733	2107	3006.17	-0.688298	0.25976	-2.64975	0.00805515	0.468374
AT2G19110	HEAVY METAL ATPASE 4 (HMA4)	Encodes a protein with similarity to Zn ATPase. Can rescue Zn deficiency in yeast and Cd resistance, suggesting a role in Zn and Cd transport. The mRNA is cell-to-cell mobile.	2642	2468	2427	1463	1317	1546	1948.39	-0.687875	0.160925	-4.2745	1.92e-05	0.0101398
AT1G61110	NAC DOMAIN CONTAINING PROTEIN 25 (NAC025)	NAC domain containing protein 25;(source:Araport11)	2425	1433	1823	1131	810	1295	1453.48	-0.680917	0.234353	-2.90551	0.00366654	0.313079
AT1G75860		DNA ligase;(source:Araport11)	291	175	262	112	133	175	186.725	-0.677761	0.262763	-2.57936	0.00989823	0.512303
AT1G78955	CAMELLIOL C SYNTHASE 1 (CAMS1)	Encodes a cyclase that generates predominantly a monocyclic triterpene alcohol. The product is 97% camelliol, 2% achilleol A and 0.2% beta-amyrin. Achilleol is an isomer of camelliol C with a 4-methylenecyclohexanol ring system.	413	258	322	207	162	198	254.8	-0.677523	0.239579	-2.82797	0.0046844	0.359227
AT4G13360		ATP-dependent caseinolytic (Clp) protease/crotonase family protein;(source:Araport11)	379	207	292	163	178	162	224.82	-0.673435	0.246781	-2.72888	0.00635501	0.434481
AT3G23620		Ribosomal RNA processing Brix domain protein;(source:Araport11)	602	391	429	245	291	286	365.688	-0.669017	0.203574	-3.28637	0.00101489	0.159212
AT3G19010		2-oxoglutarate (2OG) and Fe(II)-dependent oxygenase superfamily protein;(source:Araport11)	225	161	202	116	128	97	152.09	-0.662849	0.254403	-2.6055	0.0091739	0.496022
AT1G77300	EARLY FLOWERING IN SHORT DAYS (EFS)	Encodes a protein with histone lysine N-methyltransferase activity required specifically for the trimethylation of H3-K4 in FLC chromatin (and not in H3-K36 dimethylation). Acts as an inhibitor of flowering specifically involved in the autonomous promotion pathway. EFS also regulates the expression of genes involved in carotenoid biosynthesis.Modification of histone methylation at the CRTISO locu…	194	159	177	91	119	100	137.519	-0.661425	0.243457	-2.7168	0.00659156	0.437996
AT1G26720		transmembrane protein;(source:Araport11)	3533	2408	1707	1466	1346	1616	1969.19	-0.660294	0.241262	-2.73684	0.00620324	0.428447
AT2G46020	BRAHMA (BRM)	Encodes a SWI/SNF chromatin remodeling ATPase that upregulates transcription of all three CUC genes and is involved in the formation and/or maintenance of boundary cells during embryogenesis. Also mediates repression of expression of seed storage proteins in vegetative tissues. Interacts strongly with AtSWI3C, also with AtSWI3B, but not with AtSWI3A or AtSWI3D.	664	600	938	305	475	525	573.987	-0.659486	0.252777	-2.60896	0.0090817	0.494049
AT2G45990		ribosomal RNA small subunit methyltransferase G;(source:Araport11)	451	325	470	249	219	262	323.605	-0.650733	0.218291	-2.98103	0.0028728	0.274231
AT2G37520		Acyl-CoA N-acyltransferase with RING/FYVE/PHD-type zinc finger domain-containing protein;(source:Araport11)	269	161	221	125	118	137	168.152	-0.650565	0.250857	-2.59337	0.00950408	0.50365
AT2G35290	SMALL AUXIN UPREGULATED RNA 79 (SAUR79)	hypothetical protein;(source:Araport11)	590	606	575	302	285	468	463.89	-0.647594	0.23126	-2.80029	0.00510572	0.372128
AT5G41130		Esterase/lipase/thioesterase family protein;(source:Araport11)	1924	1601	1948	1205	889	1118	1427.18	-0.646666	0.198378	-3.25977	0.00111504	0.168396
AT5G20230	BLUE-COPPER-BINDING PROTEIN (BCB)	Encodes a Al-stress-induced gene. Along with TCF, it promotes lignin biosynthesis in response to cold stress. The mRNA is cell-to-cell mobile.	4675	3894	5203	2150	2468	3595	3595.45	-0.643713	0.2087	-3.08439	0.00203968	0.229535
AT1G17580	MYOSIN 1 (MYA1)	Encodes a member of the type XI myosin protein family involved in organelle trafficking and overall plant development.	327	240	347	136	209	198	237.844	-0.643548	0.240449	-2.67645	0.00744076	0.460088
AT1G74560	NAP1-RELATED PROTEIN 1 (NRP1)	Double nrp1-1 nrp2-1 mutants show arrest of cell cycle progression at G2/M and disordered cellular organization occurred in root tips. Localize in the nucleus and can form homomeric and heteromeric protein complexes with NRP2. Bind histones Histone2A and Histone2B and associate with chromatin in vivo. Plant mutated in both NRP1 and NRP2 genes show hypersensitivity to genotoxic stresses including …	1397	844	988	570	666	663	835.108	-0.641059	0.192939	-3.32261	0.000891809	0.147297
AT5G24350	MAG2-INTERACTING PROTEIN 2 (MIP2)	neuroblastoma-amplified sequence protein;(source:Araport11)	226	172	226	105	128	139	162.848	-0.634999	0.235955	-2.69118	0.00711991	0.455967
AT2G45260		myosin-4 protein (DUF641);(source:Araport11)	406	255	323	165	220	200	255.667	-0.630567	0.223546	-2.82075	0.00479122	0.359894
AT4G16950	RECOGNITION OF PERONOSPORA PARASITICA 5 (RPP5)	Contains a putative nucleotide binding site and leucine-rich repeats. Similar to the plant resistance genes N and L6, and to the toll and interleukin-1 receptors. Confers resistance to Peronospora parasitica.	453	300	340	220	181	253	285.399	-0.616221	0.230347	-2.67519	0.00746869	0.460088
AT1G22280	PHYTOCHROME-ASSOCIATED PROTEIN PHOSPHATASE TYPE 2C (PAPP2C)	Encodes a phytochrome-associated protein, PAPP2C (phytochrome-associated protein phosphatase type 2C). PAPP2C interacts in the nucleus with phyA (phytochrome A) and phyB. Functions as a regulator of phytochrome-interacting factor PIF3 by dephosphorylating phytochromes in the nucleus.	846	558	559	347	331	501	511.992	-0.616024	0.230166	-2.67644	0.00744096	0.460088
AT5G49070	3-KETOACYL-COA SYNTHASE 21 (KCS21)	Encodes KCS21, a member of the 3-ketoacyl-CoA synthase family involved in the biosynthesis of VLCFA (very long chain fatty acids).	828	772	578	447	427	478	580.101	-0.574469	0.204025	-2.81568	0.00486746	0.359894
AT5G02310	PROTEOLYSIS 6 (PRT6)	Encodes PROTEOLYSIS6 (PRT6), a component of the N-end rule pathway that targets protein degradation through the identity of the amino-terminal residue of specific protein substrates. Another component of the N-end rule pathway is arginyl-tRNA:protein arginyltransferase (ATE). Arabidopsis contains two ATE genes: At5g05700/ATE1, At3g11240/ATE2. PRT6 and ATE were shown to regulate seed after-ripenin…	539	398	498	222	325	350	380.733	-0.570512	0.212621	-2.68324	0.00729136	0.456827
AT5G48210		prolamin-like protein (DUF1278);(source:Araport11)	7016	5869	5222	4109	2860	4271	4821.03	-0.56596	0.212505	-2.66328	0.00773829	0.463313
AT1G67990	(TSM1)	Encodes a tapetum-specific O-methyltransferase. In vitro enzyme assay indicated activity with caffeoyl-CoA, caffeoyl glucose, chlorogenic acid and polyamine conjugates. RNAi mutants had impaired silique development and seed setting.	18694	15055	16468	12633	8020	10384	13373.8	-0.564356	0.217758	-2.59166	0.0095513	0.50365
AT1G67950		RNA-binding (RRM/RBD/RNP motifs) family protein;(source:Araport11)	294	229	258	154	163	172	208.139	-0.559491	0.207795	-2.69252	0.0070915	0.45559
AT1G70320	UBIQUITIN-PROTEIN LIGASE 2 (UPL2)	encodes a ubiquitin-protein ligase-like protein containing a HECT domain. There are six other HECT-domain UPLs in Arabidopsis.	1256	1233	1390	621	910	978	1048.25	-0.53229	0.196472	-2.70923	0.00674388	0.44167
AT2G18090		PHD finger family protein / SWIB complex BAF60b domain-containing protein / GYF domain-containing protein;(source:Araport11)	600	475	472	290	335	372	416.618	-0.521125	0.182728	-2.85191	0.0043457	0.343531
AT2G29510		hypothetical protein (DUF3527);(source:Araport11)	664	679	646	350	443	508	540.677	-0.513324	0.191202	-2.68472	0.00725914	0.456221
AT3G43920	DICER-LIKE 3 (DCL3)	Encodes a ribonuclease III family protein that is required for endogenous RDR2-dependent siRNA (but not miRNA) formation.	1064	857	876	603	547	658	755.934	-0.511528	0.172376	-2.96751	0.00300224	0.281279
AT1G09210	CALRETICULIN 1B (CRT1b)	Encodes one of three Arabidopsis calreticulins.	11733	10221	8676	6854	6197	7366	8393.39	-0.468684	0.171575	-2.73165	0.00630174	0.432299
AT1G69530	EXPANSIN A1 (EXPA1)	Member of Alpha-Expansin Gene Family. Naming convention from the Expansin Working Group (Kende et al, Plant Mol Bio). Involved in the formation of nematode-induced syncytia in roots of Arabidopsis thaliana.	4101	3595	4506	2622	2877	2668	3351.78	-0.466623	0.158746	-2.93943	0.00328812	0.297481
AT5G66190	FERREDOXIN-NADP(+)-OXIDOREDUCTASE 1 (FNR1)	Encodes a leaf-type ferredoxin:NADP(H) oxidoreductase. It is present in both chloroplast stroma and thylakoid membranes but is more abundant in the thylakoid. The affinity of this enzyme for ferredoxin is slightly, but significantly, higher than AtLFNR2, an isoform of the same enzyme. AtLFNR1 forms a heterodimer with AtFNR2 and is also a prerequisite to attach AtFNR2 to the thylakoid membrane.	6369	5893	5685	6410	8124	7312	6614.06	0.391187	0.147665	2.64915	0.0080695	0.468374
AT1G02560	NUCLEAR ENCODED CLP PROTEASE 5 (CLPP5)	One of several nuclear-encoded ClpPs (caseinolytic protease). Contains a highly conserved catalytic triad of Ser-type proteases (Ser-His-Asp). The name reflects nomenclature described in Adam et. al (2001). The mRNA is cell-to-cell mobile.	2552	2757	2446	3232	3303	3243	2928.01	0.441691	0.166442	2.65372	0.00796104	0.466964
AT2G13360	ALANINE:GLYOXYLATE AMINOTRANSFERASE (AGT)	Encodes a peroxisomal photorespiratory enzyme that catalyzes transamination reactions with multiple substrates. It is involved in photorespiration.	9839	9356	8835	11980	12985	10343	10572	0.447692	0.171462	2.61102	0.00902726	0.492886
AT5G35630	GLUTAMINE SYNTHETASE 2 (GS2)	chloroplastic glutamine synthetase The mRNA is cell-to-cell mobile.	8388	7919	9827	9857	11826	11490	9872.27	0.449682	0.1613	2.78786	0.00530569	0.381796
AT4G29700		Alkaline-phosphatase-like family protein;(source:Araport11)	2736	2654	2910	3299	3402	3947	3156.64	0.465881	0.154419	3.017	0.0025529	0.259613
AT3G46320		Histone superfamily protein;(source:Araport11)	1327	1085	1080	1360	1646	1468	1324.28	0.471851	0.156158	3.02163	0.0025142	0.256969
AT2G36885		translation initiation factor;(source:Araport11)	784	760	800	962	1014	1076	899.619	0.489031	0.158793	3.07967	0.0020723	0.229535
AT2G29180		transmembrane protein;(source:Araport11)	709	751	587	881	889	910	789.503	0.49694	0.188478	2.63659	0.00837439	0.474713
AT3G13120		Ribosomal protein S10p/S20e family protein;(source:Araport11)	3441	3598	2965	4503	4251	4321	3858.27	0.497198	0.175167	2.83843	0.00453361	0.352872
AT1G78370	GLUTATHIONE S-TRANSFERASE TAU 20 (GSTU20)	Encodes glutathione transferase belonging to the tau class of GSTs. Naming convention according to Wagner et al. (2002).	2146	1737	2155	2397	2786	2740	2322.03	0.504515	0.149006	3.38587	0.00070952	0.12912
AT1G49750		Leucine-rich repeat (LRR) family protein;(source:Araport11)	857	903	1001	1225	1219	1194	1069.88	0.506564	0.179627	2.82008	0.00480113	0.359894
AT5G51010		Rubredoxin-like superfamily protein;(source:Araport11)	892	778	972	1189	1239	1072	1025.48	0.521879	0.179927	2.90051	0.00372553	0.31678
AT1G64150	PHOTOSYNTHESIS AFFECTED MUTANT71 (PAM71)	PAM71 encodes an integral thylakoid membrane protein that is required for normal operation of oxygen-evolving complex (as evidenced by oxygen evolution rates) and for manganese incorporation. PAM71 belongs to a small gene family in Arabidopsis comprising five members. PAM71 is well conserved in the green lineage and shares homology with putative Ca2+/H+ exchangers from yeast (Saccharomyces cerevi…	242	211	205	287	302	285	255.443	0.524763	0.199979	2.62409	0.00868814	0.486942
AT1G52030	MYROSINASE-BINDING PROTEIN 2 (MBP2)	Similar to myrosinase binding proteins which may be involved in metabolizing glucosinolates and forming defense compounds to protect against herbivory. Also similar to lectins and other agglutinating factors. Expressed only in flowers.	15078	15230	13320	18531	18025	21920	17033.2	0.529291	0.162793	3.25132	0.00114872	0.172197
AT2G03420		hypothetical protein;(source:Araport11)	276	279	292	345	379	415	331.154	0.532415	0.191836	2.77536	0.00551398	0.391531
AT5G62680	NRT1/ PTR FAMILY 2.11 (NPF2.11)	Encodes a high-affinity, proton-dependent glucosinolate-specific transporter that is crucial for the transport of both methionine- and tryptophan-derived glucosinolates to seeds.	548	467	567	652	700	770	616.712	0.534608	0.168717	3.16867	0.00153137	0.19739
AT1G70760	NADH DEHYDROGENASE-LIKE COMPLEX L (NdhL)	a subunit of the chloroplast NAD(P)H dehydrogenase complex, involved in PSI cyclic electron transport. Located on the thylakoid membrane. Mutant has impaired NAD(P)H dehydrogenase activity. The mRNA is cell-to-cell mobile.	1022	1102	955	1323	1476	1346	1207.03	0.53502	0.174575	3.06469	0.00217893	0.235802
AT3G14990	DJ-1 HOMOLOG A (DJ1A)	Encodes a homolog of animal DJ-1 superfamily protein. In the A. thaliana genome, three genes encoding close homologs of human DJ-1 were identified AT3G14990 (DJ1A), AT1G53280 (DJ1B) and AT4G34020 (DJ1C). Among the three homologs, DJ1C is essential for chloroplast development and viability. It exhibits glyoxalase activity towards glyoxal and methylglyoxal. The mRNA is cell-to-cell mobile.	2718	2800	3454	4183	3828	4070	3522.67	0.539293	0.186768	2.8875	0.00388313	0.321977
AT1G13280	ALLENE OXIDE CYCLASE 4 (AOC4)	Encodes allene oxide cyclase. One of four genes in Arabidopsis that encode this enzyme, which catalyzes an essential step in jasmonic acid biosynthesis. Gene expression is reduced during senescence, a process that involves jasmonic acid signalling pathway.	3463	3844	3111	3907	5375	4878	4096.38	0.540523	0.184395	2.93132	0.00337521	0.298271
AT4G19700	(RING)	Encodes BOI (Botrytis Susceptible 1 Interactor). Has E3 ubiquitin ligase activity. Interacts with and ubiquitinates BOS1 (Botrytis Susceptible 1). It prevents caspase activation and attenuates cell death.	394	443	389	501	647	519	483.218	0.545743	0.205149	2.66023	0.00780882	0.464786
AT5G58260	NADH DEHYDROGENASE-LIKE COMPLEX N (NdhN)	Encodes subunit NDH-N of NAD(P)H:plastoquinone dehydrogenase complex (Ndh complex) present in the thylakoid membrane of chloroplasts. This subunit is thought to be required for Ndh complex assembly.	317	300	359	429	477	418	384.091	0.550838	0.196586	2.80202	0.00507837	0.372128
AT2G32480	ARABIDOPSIS SERIN PROTEASE (ARASP)	Metalloprotease essential for plastid development. Located in the inner membrane of chloroplasts.	499	562	471	612	719	769	605.978	0.55459	0.190755	2.90735	0.00364504	0.312562
AT5G17990	TRYPTOPHAN BIOSYNTHESIS 1 (TRP1)	Encodes the tryptophan biosynthetic enzyme phosphoribosylanthranilate transferase (PAT1, called trpD in bacteria). Converts anthranilate and phosphoribosylpyrophosphate into phosphoribosylanthranilate and inorganic pyrophosphate. The mRNA is cell-to-cell mobile.	300	211	304	358	366	379	319.24	0.556109	0.206803	2.68907	0.00716511	0.456221
AT5G17523		Similar to Maltose excess protein 1	286	333	338	375	492	450	379.575	0.558611	0.210538	2.65326	0.00797194	0.466964
AT4G17870	PYRABACTIN RESISTANCE 1 (PYR1)	Encodes a member of the PYR (pyrabactin resistance )/PYL(PYR1-like)/RCAR (regulatory components of ABA receptor) family proteins with 14 members. PYR/PYL/RCAR family proteins function as abscisic acid sensors. Mediate ABA-dependent regulation of protein phosphatase 2Cs ABI1 and ABI2.	349	327	384	472	555	440	422.118	0.580234	0.200521	2.89363	0.00380821	0.321121
AT3G47070		thylakoid soluble phosphoprotein;(source:Araport11)	3299	3771	2914	4236	5201	4485	3995.53	0.581312	0.18767	3.09752	0.00195146	0.227096
AT1G05550		hypothetical protein (DUF295);(source:Araport11)	289	233	213	317	321	381	291.904	0.586329	0.203989	2.87431	0.00404905	0.326457
AT4G24020	NIN LIKE PROTEIN 7 (NLP7)	Encodes NIN Like Protein 7 (NLP7). Modulates nitrate sensing and metabolism. Mutants of NLP7 show features of nitrogen-starved plants and are tolerant to drought stress. Localized in the nucleus and functions as a putative transcription factor. The mRNA is cell-to-cell mobile.	212	147	188	254	231	271	216.984	0.588769	0.222519	2.64592	0.00814684	0.468374
AT3G54600	(DJ1F)	Class I glutamine amidotransferase-like superfamily protein;(source:Araport11)	506	480	340	590	657	616	532.189	0.60226	0.210555	2.86035	0.00423173	0.335833
AT2G24395		chaperone protein dnaJ-like protein;(source:Araport11)	184	151	159	235	258	198	197.913	0.603772	0.232782	2.59372	0.0094944	0.50365
AT4G21910		MATE efflux family protein;(source:Araport11)	1422	1466	1728	2587	1966	1948	1868.55	0.613048	0.219969	2.78697	0.00532027	0.381796
AT2G14900		Gibberellin-regulated family protein;(source:Araport11)	376	375	331	372	497	681	437.023	0.613144	0.234849	2.6108	0.00903295	0.492886
AT1G55490	CHAPERONIN 60 BETA (CPN60B)	encodes the beta subunit of the chloroplast chaperonin 60, a homologue of bacterial GroEL. Mutants in this gene develops lesions on its leaves, expresses systemic acquired resistance (SAR) and develops accelerated cell death to heat shock stress. The protein has molecular chaperone activity for suppressing protein aggregation in vitro.	1939	1977	2624	3002	3205	3098	2650.03	0.61541	0.191376	3.21572	0.00130119	0.181602
AT4G25100	FE SUPEROXIDE DISMUTASE 1 (FSD1)	Fe-superoxide dismutase	13237	14484	13546	24257	18985	14951	16753.1	0.617551	0.236983	2.60588	0.00916375	0.496022
AT5G53880		hypothetical protein;(source:Araport11)	947	896	704	1015	1571	1046	1029.63	0.618937	0.224848	2.75269	0.00591085	0.41534
AT3G45140	LIPOXYGENASE 2 (LOX2)	Chloroplast lipoxygenase required for wound-induced jasmonic acid accumulation in Arabidopsis.Mutants are resistant to Staphylococcus aureus and accumulate salicylic acid upon infection. The mRNA is cell-to-cell mobile.	23209	24536	23000	38394	33248	28723	28741.7	0.621621	0.199297	3.11907	0.00181423	0.219848
AT1G74090	DESULFO-GLUCOSINOLATE SULFOTRANSFERASE 18 (SOT18)	encodes a desulfoglucosinolate sulfotransferase, involved in the final step of glucosinolate core structure biosynthesis. Has a broad-substrate specificity with preference with methionine-derived desulfoglucosinolates.	401	369	430	664	573	470	487.975	0.630906	0.227038	2.77886	0.005455	0.388707
AT5G14740	CARBONIC ANHYDRASE 2 (CA2)	Encodes a beta carbonic anhydrase likely to be localized in the cytoplasm. Expression of its mRNA is seen in etiolated seedlings and points to a possible nonphotosynthetic role for this isoform.	1255	1034	1448	1637	2130	1585	1516.12	0.631084	0.199714	3.15994	0.00157801	0.202115
AT2G18328	RAD-LIKE 4 (RL4)	RAD-like 4;(source:Araport11)	551	465	416	469	815	793	581.501	0.637141	0.227559	2.79989	0.005112	0.372128
AT5G23280	TCP DOMAIN PROTEIN 7 (TCP7)	TCP family transcription factor;(source:Araport11)	505	451	462	571	854	649	581.639	0.655458	0.197604	3.31702	0.000909828	0.147297
AT1G75460		ATP-dependent protease La (LON) domain protein;(source:Araport11)	447	467	371	620	680	579	529.681	0.658086	0.201705	3.26262	0.00110388	0.167963
AT2G30860	GLUTATHIONE S-TRANSFERASE PHI 9 (GSTF9)	Encodes glutathione transferase belonging to the phi class of GSTs. Naming convention according to Wagner et al. (2002).	6529	6266	5340	9865	6769	9763	7463.01	0.659347	0.212749	3.09919	0.00194053	0.227096
AT3G02920	(RPA32B)	Replication protein A, subunit RPA32;(source:Araport11)	119	134	111	174	183	181	151.047	0.669695	0.246288	2.71915	0.00654503	0.437996
AT4G15620	CASP-LIKE PROTEIN 1E2 (CASPL1E2)	Uncharacterized protein family (UPF0497);(source:Araport11)	189	161	158	244	295	209	209.881	0.67524	0.237596	2.84197	0.00448361	0.350328
AT5G20940		Glycosyl hydrolase family protein;(source:Araport11)	285	264	311	495	332	447	358.201	0.686917	0.240993	2.85036	0.00436698	0.34387
AT4G15630	CASP-LIKE PROTEIN 1E1 (CASPL1E1)	Uncharacterized protein family (UPF0497);(source:Araport11)	130	107	141	170	229	165	157.195	0.690042	0.257791	2.67675	0.00743394	0.460088
AT3G56090	FERRITIN 3 (FER3)	Encodes FERRITIN 3, AtFER3. Ferritins are a class of 24-mer multi-meric proteins found in all kingdoms of life. Function as the main iron store in mammals. Evidence suggests that Arabidopsis ferritins are essential to protect cells against oxidative damage, but they do not constitute the major iron pool.	2270	1952	1529	2609	2607	3440	2400.43	0.701159	0.195299	3.59017	0.000330456	0.0835931
AT3G11930		Adenine nucleotide alpha hydrolases-like superfamily protein;(source:Araport11)	568	442	414	706	803	631	595.146	0.709042	0.197777	3.58506	0.000337005	0.084197
AT2G40300	FERRITIN 4 (FER4)	Encodes FERRITIN 4, AtFER4. Ferritins are a class of 24-mer multi-meric proteins found in all kingdoms of life. Function as the main iron store in mammals. Evidence suggests that Arabidopsis ferritins are essential to protect cells against oxidative damage, but they do not constitute the major iron pool. Localize to mitochondria. Knock out mutants are not sensitive to abiotic stress.	1394	900	1096	1747	1515	1816	1411.92	0.710775	0.187747	3.78581	0.000153209	0.050008
AT3G61460	BRASSINOSTEROID-RESPONSIVE RING-H2 (BRH1)	Encodes a novel ring finger protein and forms an N-terminal hydrophobic domain and a C-terminal RING-H2 signature. Expression is down regulated by brassinolide.	313	363	520	619	708	495	506.956	0.713824	0.26855	2.65807	0.00785898	0.465036
AT1G25440	B-BOX DOMAIN PROTEIN 15 (BBX15)	B-box type zinc finger protein with CCT domain-containing protein;(source:Araport11)	328	280	267	352	538	465	371.056	0.737088	0.20799	3.54386	0.00039432	0.089226
AT4G34138	UDP-GLUCOSYL TRANSFERASE 73B1 (UGT73B1)	UDP-glucosyl transferase 73B1;(source:Araport11)	159	141	108	210	180	239	173.323	0.739657	0.256742	2.88094	0.00396491	0.322487
AT1G24575		DEAD-box ATP-dependent RNA helicase-like protein;(source:Araport11)	104	108	83	110	172	182	126.298	0.749294	0.286791	2.61268	0.00898354	0.492886
AT1G16750		GPI-anchored adhesin-like protein, putative (Protein of unknown function, DUF547);(source:Araport11)	147	155	124	184	267	217	182.694	0.751014	0.248536	3.02175	0.00251321	0.256969
AT4G06744		Leucine-rich repeat (LRR) family protein;(source:Araport11)	206	239	306	481	344	341	323.554	0.751577	0.279041	2.69343	0.00707206	0.45559
AT1G68520	B-BOX DOMAIN PROTEIN 14 (BBX14)	B-box type zinc finger protein with CCT domain-containing protein;(source:Araport11)	243	179	111	230	327	272	226.395	0.755001	0.29178	2.58757	0.00966563	0.507355
AT1G31580	(ECS1)	Encodes cell wall protein. ECS1 is not a Xcc750 resistance gene, but the genetic data indicate that ECS1 is linked to a locus influencing resistance to Xcc750. The mRNA is cell-to-cell mobile.	1298	1518	2268	2527	3401	2092	2199.44	0.760089	0.27306	2.78359	0.00537606	0.384436
AT5G24780	VEGETATIVE STORAGE PROTEIN 1 (VSP1)	encodes an acid phosphatase similar to soybean vegetative storage proteins. Gene expression is induced by wounding and jasmonic acid.	70809	80830	76237	115830	129319	115442	98688.2	0.7658	0.171142	4.47464	7.65e-06	0.00569593
AT5G57685	GLUTAMINE DUMPER 3 (GDU3)	Encodes a member of the GDU (glutamine dumper) family proteins involved in amino acid export: At4g31730 (GDU1), At4g25760 (GDU2), At5g57685 (GDU3), At2g24762 (GDU4), At5g24920 (GDU5), At3g30725 (GDU6) and At5g38770 (GDU7).	430	499	302	558	872	553	537.958	0.787636	0.272549	2.88989	0.00385376	0.321121
AT5G22620		encodes a putative 2-carboxy-D-arabinitol 1-phosphate phosphatase	119	100	158	172	235	199	164.082	0.79227	0.267354	2.96337	0.00304291	0.281594
AT4G16590	CELLULOSE SYNTHASE-LIKE A01 (CSLA01)	encodes a gene similar to cellulose synthase	4601	4765	5094	7189	9724	6513	6347.99	0.802223	0.201743	3.97647	6.99e-05	0.0267078
AT1G79410	ORGANIC CATION/CARNITINE TRANSPORTER5 (OCT5)	organic cation/carnitine transporter5;(source:Araport11)	99	108	124	151	213	189	147.817	0.839682	0.259911	3.23066	0.00123506	0.179309
AT3G18000	XIPOTL 1 (XPL1)	Arabidopsis thaliana N-methyltransferase-like protein mRNA. Reduce transmission through pollen.	1052	701	629	684	1938	1345	1048.46	0.839811	0.314073	2.67393	0.00749675	0.460088
AT3G15840	POST-ILLUMINATION CHLOROPHYLL FLUORESCENCE INCREASE (PIFI)	Encodes a chloroplast-targeted protein localized in the stroma that is a novel component essential for NDH-mediated non-photochemical reduction of the plastoquinone pool in chlororespiratory electron transport.	619	584	486	1012	819	970	753.798	0.847078	0.200779	4.21896	2.45e-05	0.0115507
AT5G23660	(SWEET12)	Encodes a member of the SWEET sucrose efflux transporter family proteins.	222	258	222	471	448	260	317.891	0.86604	0.293488	2.95086	0.00316894	0.289291
AT1G32330	HEAT SHOCK TRANSCRIPTION FACTOR A1D (HSFA1D)	Member of Heat Stress Transcription Factor (Hsf) family. Negatively regulated by HSP90.2.	88	67	108	130	164	152	118.394	0.873258	0.279699	3.12214	0.00179543	0.219432
AT4G39950	CYTOCHROME P450, FAMILY 79, SUBFAMILY B, POLYPEPTIDE 2 (CYP79B2)	Belongs to cytochrome P450 and is involved in tryptophan metabolism. Converts Trp to indo-3-acetaldoxime (IAOx), a precursor to IAA and indole glucosinolates. The mRNA is cell-to-cell mobile.	311	204	258	491	219	591	347.094	0.879898	0.339537	2.59146	0.00955683	0.50365
AT3G15170	CUP-SHAPED COTYLEDON1 (CUC1)	Encodes a transcription factor involved in shoot apical meristem formation and auxin-mediated lateral root formation. The gene is thought not to be involved in stress responses (NaCl, auxins, ethylene). <i>Cuc</i> mutant was first recognized at the heart stage, where embryos lacking two distinct bulges of cotyledonary primordia were observed.	42	56	56	89	89	86	70.3678	0.880723	0.332761	2.64671	0.00812787	0.468374
AT5G42750	BRI1 KINASE INHIBITOR 1 (BKI1)	Encodes a plasma-membrane associated phosphoprotein that interacts directly with the kinase domain of BRI1 through the evolutionarily conserved C-terminal BIM motif binding to the C-lobe of the BRI1 kinase domain. It interferes with the interaction between BRI1 with its signalling partner, the plasma membrane localised LRR-receptor kinase BAK1 by inhibiting the transphosphorylation to keep BRI1 a…	54	47	67	69	115	109	76.767	0.902258	0.333179	2.70803	0.00676838	0.441844
AT5G01600	FERRETIN 1 (FER1)	Encodes a ferretin protein that is targeted to the chloroplast. Member of a Ferritin gene family. Gene expression is induced in response to iron overload and by nitric oxide. Expression of the gene is downregulated in the presence of paraquat, an inducer of photoxidative stress.	5852	3602	7714	10732	9481	9365	7839.28	0.912851	0.255698	3.57003	0.000356935	0.0870276
AT5G07460	PEPTIDEMETHIONINE SULFOXIDE REDUCTASE 2 (PMSR2)	ubiquitous enzyme that repairs oxidatively damaged proteins. Methionine sulfoxide reductase activity. Mutant lacking reductase activity showed increased protein oxidation, nitration and glycation of specific amino acid residues during darkness.	74	64	70	108	126	139	97.1116	0.951301	0.271385	3.50536	0.000455984	0.0981675
AT1G75750	GAST1 PROTEIN HOMOLOG 1 (GASA1)	GA-responsive GAST1 protein homolog regulated by BR and GA antagonistically. Possibly involved in cell elongation based on expression data The mRNA is cell-to-cell mobile.	379	440	245	566	737	631	502.825	0.962507	0.256944	3.74598	0.000179694	0.0568198
AT1G52040	MYROSINASE-BINDING PROTEIN 1 (MBP1)	Encodes myrosinase-binding protein expressed in flowers.	3193	2549	2519	3811	4368	6844	3874.87	0.966906	0.216121	4.47391	7.68e-06	0.00569593
AT3G20520	SHV3-LIKE 3 (SVL3)	Encodes a member of the glycerophosphodiester phosphodiesterase like (GDPD-like) family.	41	47	36	54	84	95	59.5852	1.00244	0.365294	2.74419	0.00606599	0.420402
AT2G36430		transmembrane protein, putative (DUF247);(source:Araport11)	74	82	60	116	167	125	104.653	1.02023	0.300149	3.39908	0.000676134	0.12566
AT4G30270	XYLOGLUCAN ENDOTRANSGLUCOSYLASE/HYDROLASE 24 (XTH24)	encodes a protein similar to endo xyloglucan transferase in sequence. It is also very similar to BRU1 in soybean, which is involved in brassinosteroid response.	126	170	146	416	194	212	215.798	1.02207	0.363039	2.81532	0.00487281	0.359894
AT5G20670		DUF1677 family protein (DUF1677);(source:Araport11)	199	136	169	340	449	163	244.918	1.04959	0.352942	2.97383	0.00294106	0.278769
AT5G50335		hypothetical protein;(source:Araport11)	144	145	139	299	331	191	210.782	1.0575	0.283791	3.72632	0.000194295	0.0592875
AT4G01080	TRICHOME BIREFRINGENCE-LIKE 26 (TBL26)	Encodes a member of the TBL (TRICHOME BIREFRINGENCE-LIKE) gene family containing a plant-specific DUF231 (domain of unknown function) domain. TBL gene family has 46 members, two of which (TBR/AT5G06700 and TBL3/AT5G01360) have been shown to be involved in the synthesis and deposition of secondary wall cellulose, presumably by influencing the esterification state of pectic polymers. A nomenclature…	979	1070	1283	2218	2206	2009	1645.59	1.05771	0.198124	5.33864	9.36e-08	0.000157929
AT3G28270	AT14A-LIKE1 (AFL1)	AFL1 was first identified by immunoscreening an Arabidopsis expression library with antisera recognizing mammalian &#946;1-integrin. It is a peripheral membrane protein associated with endomembranes and plasmamembrane. Based on overexpression and knockdown phenotypes, AFL1 is postulated to function in regulation of growth and proline accumulation in response to drought. AFL1 protein co-localizes …	143	145	281	522	383	199	284.998	1.088	0.39965	2.72238	0.00648127	0.437996
AT4G13770	CYTOCHROME P450, FAMILY 83, SUBFAMILY A, POLYPEPTIDE 1 (CYP83A1)	Encodes a cytochrome p450 enzyme that catalyzes the initial conversion of aldoximes to thiohydroximates in the synthesis of glucosinolates not derived from tryptophan. Also has a role in auxin homeostasis.	157	150	193	249	422	340	252.668	1.11452	0.252192	4.41933	9.9e-06	0.00667886
AT4G23600	CORONATINE INDUCED 1 (CORI3)	Encodes cystine lyase which is expected to be involved in amino acid metabolism, providing the plant with cysteine and the generation of precursors of ethylene biosynthesis. mRNA levels are elevated in response to wounding.	2817	3432	4213	9531	7327	4165	5363.85	1.13092	0.31577	3.58148	0.000341657	0.0843185
AT3G55310		NAD(P)-binding Rossmann-fold superfamily protein;(source:Araport11)	46	58	71	164	128	60	89.9198	1.13375	0.433872	2.61311	0.00897237	0.492886
AT5G65080	MADS AFFECTING FLOWERING 5 (MAF5)	Is upregulated during vernalization and regulates flowering time. Encodes MADS-domain protein. Two variants encoding proteins of 198 and 184 amino acids have been reported.	50	70	60	105	139	133	93.6561	1.15997	0.308968	3.75433	0.000173804	0.0558296
AT2G29500		HSP20-like chaperones superfamily protein;(source:Araport11)	18	21	29	49	49	43	35.2935	1.16078	0.442502	2.62322	0.00871043	0.486942
AT1G18193		hypothetical protein;(source:Araport11)	28	52	34	87	60	92	59.8368	1.16301	0.413337	2.8137	0.00489746	0.360399
AT2G05380	GLYCINE-RICH PROTEIN 3 SHORT ISOFORM (GRP3S)	glycine-rich protein 3 short isoform (GRP3S) mRNA, complete The mRNA is cell-to-cell mobile.	1238	1730	1234	3777	3144	1862	2211.75	1.1794	0.30294	3.8932	9.89e-05	0.0345189
AT2G21640		Encodes a protein of unknown function that is a marker for oxidative stress response.Expression in rosette leaves is activated by high concentration of boron.	78	63	73	141	158	151	111.473	1.18678	0.258743	4.58672	4.5e-06	0.00398137
AT3G46900	COPPER TRANSPORTER 2 (COPT2)	encodes a member of copper transporter family and functionally complements a high affinity copper transporter mutant in yeast	30	30	23	35	89	55	43.7004	1.20313	0.45433	2.64813	0.00809375	0.468374
AT5G62730		Major facilitator superfamily protein;(source:Araport11)	182	275	343	820	653	236	429.739	1.21791	0.421962	2.8863	0.00389802	0.321977
AT4G15690	(GRXS5)	Thioredoxin superfamily protein;(source:Araport11)	46	35	42	109	90	62	65.0299	1.21808	0.376578	3.23461	0.00121807	0.178624
AT2G43610		Chitinase family protein;(source:Araport11)	95	81	74	107	270	173	133.28	1.23536	0.342068	3.61145	0.000304495	0.0821608
AT5G44580		transmembrane protein;(source:Araport11)	46	23	57	75	89	110	66.7799	1.23669	0.386379	3.20073	0.00137081	0.18494
AT5G24420	6-PHOSPHOGLUCONOLACTONASE 5 (PGL5)	Encodes a cytosolic 6-phosphogluconolactonase (PGL) thought to be involved in the oxidative pentose-phosphate pathway (OPPP).	2700	1920	3095	8779	2959	4687	4120.4	1.24232	0.357886	3.47128	0.000517985	0.105883
AT3G43670		Copper amine oxidase family protein;(source:Araport11)	152	213	127	320	311	484	270.342	1.26987	0.292606	4.33988	1.43e-05	0.00874232
AT1G35310	MLP-LIKE PROTEIN 168 (MLP168)	MLP-like protein 168;(source:Araport11)	305	300	185	620	771	387	433.946	1.28897	0.308571	4.17721	2.95e-05	0.0132712
AT5G18270	ARABIDOPSIS NAC DOMAIN CONTAINING PROTEIN 87 (ANAC087)	NAC domain containing protein 87;(source:Araport11)	14	15	17	30	35	41	25.5369	1.30624	0.488549	2.67371	0.00750181	0.460088
AT4G25260		Plant invertase/pectin methylesterase inhibitor superfamily protein;(source:Araport11)	50	32	81	147	140	84	90.4405	1.31712	0.411166	3.20336	0.00135832	0.184485
AT2G18690		transmembrane protein;(source:Araport11)	60	87	46	170	115	165	109.089	1.3257	0.356386	3.71986	0.000199337	0.0592875
AT3G28740	CYTOCHROME P450, FAMILY 81, SUBFAMILY D, POLYPEPTIDE 11 (CYP81D11)	Encodes a member of the cytochrome p450 family. Expression is upregulated in response to cis-jasmonate treatment. Overexpression induces synthesis of volatile compounds that affect chemical ecology and insect interactions.	87	42	79	199	192	81	115.133	1.33148	0.415082	3.20775	0.00133778	0.184168
AT1G20680		transport/golgi organization-like protein (DUF833);(source:Araport11)	46	36	37	88	96	95	66.9154	1.3454	0.317549	4.23683	2.27e-05	0.0109232
AT3G57950		cotton fiber protein;(source:Araport11)	30	46	82	116	144	122	91.2301	1.36758	0.398468	3.43209	0.000598945	0.115437
AT2G25450		encodes a protein whose sequence is similar to ACC oxidase	93	73	84	262	148	199	145.843	1.41689	0.311178	4.55332	5.28e-06	0.00440679
AT1G76790	INDOLE GLUCOSINOLATE O-METHYLTRANSFERASE 5 (IGMT5)	Encodes a protein with similarity to N-acetylserotonin O-methyltransferase (ASMT) but it does not have ASMT activity in vitro.	488	373	248	1521	438	781	659.676	1.4636	0.407199	3.59432	0.000325242	0.0833155
AT3G22600	GLYCOSYLPHOSPHATIDYLINOSITOL-ANCHORED LIPID PROTEIN TRANSFER 5 (LTPG5)	Bifunctional inhibitor/lipid-transfer protein/seed storage 2S albumin superfamily protein;(source:Araport11)	11	29	21	38	60	75	39.4061	1.57116	0.505056	3.11086	0.00186542	0.223376
AT4G34135	UDP-GLUCOSYLTRANSFERASE 73B2 (UGT73B2)	The At4g34135 gene encodes a flavonol 7-O-glucosyltransferase (EC 2.4.1.237) that glucosylates also with a 20 fold lower activity flavonols (kaempferol and quercetin) at the 3-O-position.	22	40	50	92	106	116	72.0547	1.57577	0.387688	4.06454	4.81e-05	0.0207228
AT5G09530	PRO-GLU-LEU|ILE|VAL-PRO-LYS 1 (PELPK1)	The gene encodes a unique protein which contains 36 repeats of a unique pentapeptide (Pro-Glu-Leu|Ile|Val-Pro-Lys). It has been shown tobe involved in growth and development.	57	55	31	115	100	187	91.6086	1.59547	0.371834	4.29082	1.78e-05	0.0101398
AT5G24920	GLUTAMINE DUMPER 5 (GDU5)	Encodes a member of the GDU (glutamine dumper) family proteins involved in amino acid export: At4g31730 (GDU1), At4g25760 (GDU2), At5g57685 (GDU3), At2g24762 (GDU4), At5g24920 (GDU5), At3g30725 (GDU6) and At5g38770 (GDU7).	29	16	16	62	62	44	38.7046	1.59794	0.449219	3.55716	0.000374887	0.0872022
AT1G02820	LATE EMBRYOGENESIS ABUNDANT 3 (LEA3)	Late embryogenesis abundant 3 (LEA3) family protein;(source:Araport11)	60	34	45	130	91	173	89.6767	1.62817	0.355055	4.58569	4.52e-06	0.00398137
AT2G43100	ISOPROPYLMALATE ISOMERASE 2 (IPMI2)	isopropylmalate isomerase 2;(source:Araport11)	38	26	35	74	123	92	65.1355	1.65684	0.355305	4.66314	3.11e-06	0.00315106
AT5G63560	FATTY ALCOHOL:CAFFEOYL-COA CAFFEOYL TRANSFERASE (FACT)	HXXXD-type acyl-transferase family protein;(source:Araport11)	15	14	30	38	70	79	41.1971	1.7542	0.486643	3.60469	0.000312521	0.0824438
AT1G65970	THIOREDOXIN-DEPENDENT PEROXIDASE 2 (TPX2)	thioredoxin-dependent peroxidase 2	12	14	16	46	56	32	29.9264	1.7849	0.501367	3.56008	0.000370743	0.0872022
AT3G04720	PATHOGENESIS-RELATED 4 (PR4)	Encodes a protein similar to the antifungal chitin-binding protein hevein from rubber tree latex. mRNA levels increase in response to ethylene and turnip crinkle virus infection. The mRNA is cell-to-cell mobile.	40	32	30	68	131	131	72.2797	1.79364	0.364268	4.92396	8.48e-07	0.00122592
AT1G72290	WATER-SOLUBLE CHLOROPHYLL PROTEIN (ATWSCP)	Encodes a Kunitz-protease inhibitor, a water-soluble chlorophyll protein involved in herbivore resistance activation.	68	46	23	40	262	143	96.3759	1.79447	0.559823	3.20543	0.00134862	0.184406
AT5G39610	NAC DOMAIN CONTAINING PROTEIN 6 (NAC6)	Encodes a NAC-domain transcription factor. Positively regulates aging-induced cell death and senescence in leaves. This gene is upregulated in response to salt stress in wildtype as well as NTHK1 transgenic lines although in the latter case the induction was drastically reduced. It was also upregulated by ABA, ACC and NAA treatment, although in the latter two cases, the induction occurred relativ…	25	10	33	86	78	72	51.5662	1.92785	0.449858	4.28547	1.82e-05	0.0101398
AT4G26950		senescence regulator (Protein of unknown function, DUF584);(source:Araport11)	10	7	8	21	30	44	20.1073	2.0289	0.593081	3.42096	0.000624012	0.11802
AT5G05340	PEROXIDASE 52 (PRX52)	Encodes a protein with sequence similarity to peroxidases that is involved in lignin biosynthesis. Loss of function mutations show abnormal development of xylem fibers and reduced levels of lignin biosynthetic enxymes.	2	20	13	29	44	66	29.4215	2.03327	0.686239	2.96292	0.00304734	0.281594
AT3G19390		Granulin repeat cysteine protease family protein;(source:Araport11)	105	38	54	196	292	258	158.299	2.05541	0.337176	6.09595	1.09e-09	3.51e-06
AT5G24160	SQUALENE MONOXYGENASE 6 (SQE6)	squalene monooxygenase 6;(source:Araport11)	6	10	8	36	26	32	20.1849	2.07662	0.594393	3.49369	0.000476399	0.100426
AT2G34700		Pollen Ole e 1 allergen and extensin family protein;(source:Araport11)	10	12	4	4	63	45	22.8581	2.1692	0.840204	2.58175	0.00983008	0.51008
AT5G42830		HXXXD-type acyl-transferase family protein;(source:Araport11)	10	13	11	51	39	55	30.5101	2.20011	0.493754	4.45587	8.36e-06	0.0058305
AT3G01080	WRKY DNA-BINDING PROTEIN 58 (WRKY58)	member of WRKY Transcription Factor; Group I	2	10	7	24	31	28	17.3905	2.20277	0.693645	3.17565	0.001495	0.195189
AT5G41040	REDUCED LEVELS OF WALL-BOUND PHENOLICS 1 (RWP1)	Encodes a feruloyl-CoA transferase required for suberin synthesis. Has feruloyl-CoA-dependent feruloyl transferase activity towards substrates with a primary alcohol.	13	4	4	30	15	45	18.7076	2.24249	0.720116	3.11407	0.00184527	0.222278
AT5G58860	CYTOCHROME P450, FAMILY 86, SUBFAMILY A, POLYPEPTIDE 1 (CYP86A1)	Encodes a member of the CYP86A subfamily of cytochrome p450 genes. Expressed significantly only in root tissue.	18	12	4	49	59	40	30.898	2.2521	0.559659	4.02405	5.72e-05	0.0226995
AT2G20800	NAD(P)H DEHYDROGENASE B4 (NDB4)	NAD(P)H dehydrogenase B4;(source:Araport11)	17	12	6	40	31	86	32.259	2.27455	0.584112	3.89404	9.86e-05	0.0345189
AT1G56320		hypothetical protein;(source:Araport11)	7	2	2	9	17	23	9.98646	2.27754	0.87834	2.593	0.00951417	0.50365
AT5G50443		transmembrane protein;(source:Araport11)	8	1	6	30	16	21	14.0118	2.3195	0.786163	2.95041	0.00317352	0.289291
AT1G62560	FLAVIN-MONOOXYGENASE GLUCOSINOLATE S-OXYGENASE 3 (FMO GS-OX3)	belongs to the flavin-monooxygenase (FMO) family, encodes a glucosinolate S-oxygenase that catalyzes the conversion of methylthioalkyl glucosinolates to methylsulfinylalkyl glucosinolates The mRNA is cell-to-cell mobile.	6	8	6	16	54	25	19.3467	2.33283	0.68637	3.3988	0.000676827	0.12566
AT3G52780	(PAP20)	Purple acid phosphatases superfamily protein;(source:Araport11)	14	6	4	20	62	33	23.2475	2.38004	0.668648	3.55947	0.000371597	0.0872022
AT3G28300	(AT14A)	Possesses a transmembrane domain and a small region that has sequence similarities to integrins from fungi, insects and humans. Is localized to plasma membrane and cytoplasm.	7	5	10	70	14	18	21.8024	2.38316	0.780962	3.05157	0.00227648	0.243752
AT3G28290	(AT14A)	Encodes a protein with sequence similarity to integrins. Localized to the cytoplasm and plasma membrane. Expressed in all tissues assayed.	7	5	10	70	15	18	21.97	2.3963	0.773192	3.09923	0.00194022	0.227096
AT3G62730		desiccation-like protein;(source:Araport11)	10	8	3	35	36	41	22.5871	2.53253	0.595752	4.25098	2.13e-05	0.0107681
AT5G09480		hydroxyproline-rich glycoprotein family protein;(source:Araport11)	22	11	10	59	66	112	47.1269	2.57947	0.468465	5.50621	3.67e-08	7.42e-05
AT2G40370	LACCASE 5 (LAC5)	putative laccase, a member of laccase family of genes (17 members in Arabidopsis).	6	2	0	12	16	16	8.75853	2.60063	0.999228	2.60264	0.00925084	0.496576
AT2G25940	ALPHA-VACUOLAR PROCESSING ENZYME (ALPHA-VPE)	Encodes a vacuolar processing enzyme belonging to a novel group of cysteine proteinases that is expressed in vegetative organs and is upregulated in association with various types of cell death and under stressed conditions.	2	6	0	18	14	14	9.31227	2.61558	1.00412	2.60485	0.00919149	0.496022
AT4G26200	1-AMINO-CYCLOPROPANE-1-CARBOXYLATE SYNTHASE 7 (ACS7)	Member of a family of proteins in Arabidopsis that encode 1-Amino-cyclopropane-1-carboxylate synthase, an enzyme involved in ethylene biosynthesis. Not expressed in response to IAA.	6	2	2	23	16	18	11.4531	2.6585	0.823941	3.22656	0.00125286	0.179395
AT5G66390	PEROXIDASE 72 (PRX72)	Encodes a peroxidase that is involved in lignin biosynthesis.	16	19	16	69	85	152	60.1993	2.67375	0.432188	6.18656	6.15e-10	2.49e-06
AT1G24625	ZINC FINGER PROTEIN 7 (ZFP7)	Encodes a zinc finger protein containing only a single zinc finger.	2	1	6	17	21	16	10.7362	2.69864	0.874203	3.08698	0.00202204	0.229535
AT5G23010	METHYLTHIOALKYLMALATE SYNTHASE 1 (MAM1)	Encodes a methylthioalkylmalate synthase, catalyzes the condensation reactions of the first two rounds of methionine chain elongation in the biosynthesis of methionine-derived glucosinolates. The mRNA is cell-to-cell mobile.	5	0	6	8	32	27	12.98	2.71731	0.930314	2.92085	0.00349076	0.305548
AT3G55180	(MAGL10)	alpha/beta-Hydrolases superfamily protein;(source:Araport11)	2	2	2	18	8	10	7.28522	2.72038	1.01809	2.67203	0.00753931	0.460946
AT4G26150	CYTOKININ-RESPONSIVE GATA FACTOR 1 (CGA1)	Encodes a member of the GATA factor family of zinc finger transcription factors. Modulate chlorophyll biosynthesis and glutamate synthase (GLU1/Fd-GOGAT) expression.	2	2	2	10	23	6	7.6564	2.80776	1.04052	2.69841	0.00696724	0.450467
AT2G18370		Predicted to encode a PR (pathogenesis-related) protein. Belongs to the lipid transfer protein (PR-14) family with the following members: At2g38540/LTP1, At2g38530/LTP2, At5g59320/LTP3, At5g59310/LTP4, At3g51600/LTP5, At3g08770/LTP6, At2g15050/LTP7, At2g18370/LTP8, At2g15325/LTP9, At5g01870/LTP10, At4g33355/LTP11, At3g51590/LTP12, At5g44265/LTP13, At5g62065/LTP14, At4g08530/LTP15.	10	10	4	26	62	71	30.7014	2.81614	0.593678	4.74354	2.1e-06	0.00223691
AT3G58550		Bifunctional inhibitor/lipid-transfer protein/seed storage 2S albumin superfamily protein;(source:Araport11)	36	10	8	86	136	200	79.8717	3.09954	0.509938	6.07827	1.21e-09	3.51e-06
AT1G75945		hypothetical protein;(source:Araport11)	2	0	4	32	4	10	9.19473	3.12195	1.18112	2.64321	0.00821234	0.469472
AT4G36430		Peroxidase superfamily protein;(source:Araport11)	136	209	141	1152	1019	1938	781.448	3.16366	0.296027	10.6871	1.17e-26	1.18e-22
AT2G18150		Peroxidase superfamily protein;(source:Araport11)	52	42	35	281	356	544	221.627	3.29629	0.300842	10.9569	6.16e-28	1.25e-23
AT4G12960	GAMMA-INTERFERON-RESPONSIVE LYSOSOMAL THIOL REDUCTASE (GILT)	Gamma interferon responsive lysosomal thiol (GILT) reductase family protein;(source:Araport11)	6	0	2	2	31	43	13.8247	3.36721	1.12938	2.98146	0.00286881	0.274231
AT3G06390	CASP-LIKE PROTEIN 1D2 (CASPL1D2)	Uncharacterized protein family (UPF0497);(source:Araport11)	2	0	2	10	8	20	7.09633	3.36957	1.1538	2.92041	0.00349575	0.305548
AT3G46070		C2H2-type zinc finger family protein;(source:Araport11)	2	0	2	8	22	18	8.74291	3.69555	1.09695	3.36895	0.000754551	0.130511
AT5G06740	L-TYPE LECTIN RECEPTOR KINASE S.5 (LECRK-S.5)	Concanavalin A-like lectin protein kinase family protein;(source:Araport11)	2	2	0	24	16	10	9.41822	3.78362	1.08765	3.4787	0.00050386	0.104047
AT2G38380		Peroxidase superfamily protein;(source:Araport11)	4	2	0	18	22	63	18.3001	4.20458	0.924712	4.54691	5.44e-06	0.00440679
AT1G26762		transmembrane protein;(source:Araport11)	0	0	2	20	14	18	9.33907	4.81753	1.29431	3.72208	0.000197591	0.0592875
AT3G48080		alpha/beta-Hydrolases superfamily protein;(source:Araport11)	0	0	0	4	8	5	2.9046	5.0459	1.84771	2.73089	0.00631634	NA
AT1G24430		HXXXD-type acyl-transferase family protein;(source:Araport11)	0	0	0	6	5	8	3.26575	5.21389	1.78026	2.92873	0.00340352	NA
AT3G09240	BRASSINOSTEROID-SIGNALING KINASE 9 (BSK9)	kinase with tetratricopeptide repeat domain-containing protein;(source:Araport11)	0	0	0	6	6	8	3.43335	5.28633	1.75142	3.01831	0.00254187	NA
AT3G20380		TRAF-like family protein;(source:Araport11)	0	0	0	4	6	19	4.86711	5.7929	1.69275	3.42219	0.000621187	0.11802
AT5G43066		transmembrane protein;(source:Araport11)	0	0	0	13	12	9	5.90364	6.0664	1.54667	3.92224	8.77e-05	0.0317037

## Sheet: Table S6
Table S6 DEGs in phenylpropanoid biosynthesis pathway and glucosinolate biosynthesis pathway.
Path Way	Enzyme ID	TAIR_ID	Name	log2FoldChange	P value
Phenylpropanoid biosynthesis	1.1.1.195	AT2G21730	CINNAMYL ALCOHOL DEHYDROGENASE HOMOLOG 2 (CAD2)	-0.73	0.0069
	1.1.1.195	AT2G21890	CINNAMYL ALCOHOL DEHYDROGENASE HOMOLOG 3 (CAD3)	-0.96	0.0066
	1.11.1.7	AT2G18150	PEROXIDASE 15 (PRX15)	3.29	6.16e-28
	1.11.1.7	AT2G38380	PEROXIDASE 22 (PRX22)	4.2	5.44e-06
	1.11.1.7	AT4G36430	PEROXIDASE 49 (PRX49)	3.16	1.17e-26
	1.11.1.7	AT5G05340	PEROXIDASE 52 (PRX52)	2.03	0.003
	1.11.1.7	AT5G66390	PEROXIDASE 72 (PRX72)	2.67	6.15e-10
	1.14.13.-	AT1G74540	CYTOCHROME P450, FAMILY 98, SUBFAMILY A, POLYPEPTIDE 8 (CYP98A8)	-0.74	0.0066
	2.1.1-	AT1G67990	TAPETUM-SPECIFIC METHYLTRANSFERASE 1 (ATTSM1); (TSM1)	-0.56	0.0096
	3.2.1.21	AT1G75940	BETA GLUCOSIDASE 20 (BGLU20); (ATA27)	-0.69	0.002
	3.2.1.21	AT3G47040	Glycosyl hydrolase family protein	-2.14	0.0048
	3.2.1.21	AT5G20940	Glycosyl hydrolase family protein	0.68	0.0044
Glucosinolate biosynthesis	2.3.3.17	AT5G23010	METHYLTHIOALKYLMALATE SYNTHASE 1 (MAM1)	2.71731	0.00349076
	1.14.14.156	AT4G39950	CYTOCHROME P450, FAMILY 79, SUBFAMILY B, POLYPEPTIDE 2 (CYP79B2)	0.879898	0.00955683
	1.14.14.43	AT4G13770	CYTOCHROME P450, FAMILY 83, SUBFAMILY A, POLYPEPTIDE 1 (CYP83A1)	1.11452	9.9e-06

## Sheet: Table S7
Table S7 DEGs regulated by jasmonates and OPDA.
	Geneid	Gene.Model.Name	Gene.Model.Description	Gene.Model.Type	Primary.Gene.Symbol	W2_.sort.bam	W3_.sort.bam	W4_.sort.bam	O1_.sort.bam	O2_.sort.bam	O3_.sort.bam	baseMean	log2FoldChange	lfcSE	stat	P value	P adj	direction	regulated in some directiona
Jasmonates regulated genesa	AT1G13280	Encodes allene oxide cyclase. One of four genes in Arabidopsis that encode this enzyme, which catalyzes an essential step in jasmonic acid biosynthesis. Gene expression is reduced during senescence, a process that involves jasmonic acid signalling pathway.	protein_coding	ALLENE OXIDE CYCLASE 4 (AOC4)	ALLENE OXIDE CYCLASE 4 (AOC4)	3463	3844	3111	3907	5375	4878	4096.38	0.540523	0.184395	2.93132	0.00337521	0.298271	0.540523	yes
	AT1G52030	Similar to myrosinase binding proteins which may be involved in metabolizing glucosinolates and forming defense compounds to protect against herbivory. Also similar to lectins and other agglutinating factors. Expressed only in flowers.	protein_coding	MYROSINASE-BINDING PROTEIN 2 (MBP2)	(F-ATMBP);MYROSINASE-BINDING PROTEIN 2 (MBP2); (MBP1.2)	15078	15230	13320	18531	18025	21920	17033.2	0.529291	0.162793	3.25132	0.00114872	0.172197	0.529291	yes
	AT1G52040	Encodes myrosinase-binding protein expressed in flowers.	protein_coding	MYROSINASE-BINDING PROTEIN 1 (MBP1)	MYROSINASE-BINDING PROTEIN 1 (MBP1); (ATMBP)	3193	2549	2519	3811	4368	6844	3874.87	0.966906	0.216121	4.47391	7.68e-06	0.00569593	0.966906	yes
	AT1G65970	thioredoxin-dependent peroxidase 2	protein_coding	THIOREDOXIN-DEPENDENT PEROXIDASE 2 (TPX2)	THIOREDOXIN-DEPENDENT PEROXIDASE 2 (TPX2)	12	14	16	46	56	32	29.9264	1.7849	0.501367	3.56008	0.000370743	0.0872022	-1.7849	no
	AT1G76790b,c,d	Encodes a protein with similarity to N-acetylserotonin O-methyltransferase (ASMT) but it does not have ASMT activity in vitro.	protein_coding	INDOLE GLUCOSINOLATE O-METHYLTRANSFERASE 5 (IGMT5)	INDOLE GLUCOSINOLATE O-METHYLTRANSFERASE 5 (IGMT5)	488	373	248	1521	438	781	659.676	1.4636	0.407199	3.59432	0.000325242	0.0833155	1.4636	yes
	AT1G79410	organic cation/carnitine transporter5;(source:Araport11)	protein_coding	ORGANIC CATION/CARNITINE TRANSPORTER5 (OCT5)	ORGANIC CATION/CARNITINE TRANSPORTER5 (OCT5);ORGANIC CATION/CARNITINE TRANSPORTER5 (AtOCT5)	99	108	124	151	213	189	147.817	0.839682	0.259911	3.23066	0.00123506	0.179309	0.839682	yes
	AT2G29500	HSP20-like chaperones superfamily protein;(source:Araport11)	protein_coding			18	21	29	49	49	43	35.2935	1.16078	0.442502	2.62322	0.00871043	0.486942	1.16078	yes
	AT2G30860b	Encodes glutathione transferase belonging to the phi class of GSTs. Naming convention according to Wagner et al. (2002).	protein_coding	GLUTATHIONE S-TRANSFERASE PHI 9 (GSTF9)	GLUTATHIONE S-TRANSFERASE PHI 9 (ATGSTF9);GLUTATHIONE S-TRANSFERASE PHI 9 (GSTF9); (ATGSTF7); (GLUTTR)	6529	6266	5340	9865	6769	9763	7463.01	0.659347	0.212749	3.09919	0.00194053	0.227096	0.659347	yes
	AT3G28270	AFL1 was first identified by immunoscreening an Arabidopsis expression library with antisera recognizing mammalian &#946;1-integrin. It is a peripheral membrane protein associated with endomembranes and plasmamembrane. Based on overexpression and knockdown phenotypes, AFL1 is postulated to function in regulation of growth and proline accumulation in response to drought. AFL1 protein co-localizes …	protein_coding	AT14A-LIKE1 (AFL1)	AT14A-LIKE1 (AFL1)	143	145	281	522	383	199	284.998	1.088	0.39965	2.72238	0.00648127	0.437996	1.088	yes
	AT3G28290	Encodes a protein with sequence similarity to integrins. Localized to the cytoplasm and plasma membrane. Expressed in all tissues assayed.	protein_coding	(AT14A)	(AT14A)	7	5	10	70	15	18	21.97	2.3963	0.773192	3.09923	0.00194022	0.227096	2.3963	yes
	AT3G28300	Possesses a transmembrane domain and a small region that has sequence similarities to integrins from fungi, insects and humans. Is localized to plasma membrane and cytoplasm.	protein_coding	(AT14A)	(AT14A)	7	5	10	70	14	18	21.8024	2.38316	0.780962	3.05157	0.00227648	0.243752	2.38316	yes
	AT3G28740b	Encodes a member of the cytochrome p450 family. Expression is upregulated in response to cis-jasmonate treatment. Overexpression induces synthesis of volatile compounds that affect chemical ecology and insect interactions.	protein_coding	CYTOCHROME P450, FAMILY 81, SUBFAMILY D, POLYPEPTIDE 11 (CYP81D11)	CYTOCHROME P450, FAMILY 81, SUBFAMILY D, POLYPEPTIDE 11 (CYP81D11)	87	42	79	199	192	81	115.133	1.33148	0.415082	3.20775	0.00133778	0.184168	1.33148	yes
	AT3G45140b,c	Chloroplast lipoxygenase required for wound-induced jasmonic acid accumulation in Arabidopsis.Mutants are resistant to Staphylococcus aureus and accumulate salicylic acid upon infection. The mRNA is cell-to-cell mobile.	protein_coding	LIPOXYGENASE 2 (LOX2)	LIPOXYGENASE 2 (LOX2);ARABIODOPSIS THALIANA LIPOXYGENASE 2 (ATLOX2)	23209	24536	23000	38394	33248	28723	28741.7	0.621621	0.199297	3.11907	0.00181423	0.219848	0.621621	yes
	AT4G01080b	Encodes a member of the TBL (TRICHOME BIREFRINGENCE-LIKE) gene family containing a plant-specific DUF231 (domain of unknown function) domain. TBL gene family has 46 members, two of which (TBR/AT5G06700 and TBL3/AT5G01360) have been shown to be involved in the synthesis and deposition of secondary wall cellulose, presumably by influencing the esterification state of pectic polymers. A nomenclature…	protein_coding	TRICHOME BIREFRINGENCE-LIKE 26 (TBL26)	TRICHOME BIREFRINGENCE-LIKE 26 (TBL26)	979	1070	1283	2218	2206	2009	1645.59	1.05771	0.198124	5.33864	9.36e-08	0.000157929	1.05771	yes
	AT4G21910b,d	MATE efflux family protein;(source:Araport11)	protein_coding			1422	1466	1728	2587	1966	1948	1868.55	0.613048	0.219969	2.78697	0.00532027	0.381796	0.613048	yes
	AT4G22780	Member of a family of ACT domain containing proteins . ACT domains are involved in amino acid binding .	protein_coding	ACT DOMAIN REPEAT 7 (ACR7)	ACT DOMAIN REPEAT 7 (ACR7)	1063	633	580	222	199	505	515.322	-1.18377	0.340107	-3.48057	0.00050034	0.104047	1.18377	yes
	AT4G23600b	Encodes cystine lyase which is expected to be involved in amino acid metabolism, providing the plant with cysteine and the generation of precursors of ethylene biosynthesis. mRNA levels are elevated in response to wounding.	protein_coding	CORONATINE INDUCED 1 (CORI3)	JASMONIC ACID RESPONSIVE 2 (JR2);CORONATINE INDUCED 1 (CORI3)	2817	3432	4213	9531	7327	4165	5363.85	1.13092	0.31577	3.58148	0.000341657	0.0843185	1.13092	yes
	AT4G29700b,c,d	Alkaline-phosphatase-like family protein;(source:Araport11)	protein_coding			2736	2654	2910	3299	3402	3947	3156.64	0.465881	0.154419	3.017	0.0025529	0.259613	0.465881	yes
	AT4G31800	Pathogen-induced transcription factor. Binds W-box sequences in vitro. Forms protein complexes with itself and with WRKY40 and WRKY60. Constitutive expression of WRKY18 enhanced resistance to P. syringae, but its coexpression with WRKY40 or WRKY60 made plants more susceptible to both P. syringae and B. cinerea. WRKY18, WRKY40, and WRKY60 have partially redundant roles in response to the hemibiotr…	protein_coding	WRKY DNA-BINDING PROTEIN 18 (WRKY18)	ARABIDOPSIS THALIANA WRKY DNA-BINDING PROTEIN 18 (ATWRKY18);WRKY DNA-BINDING PROTEIN 18 (WRKY18)	731	638	775	226	197	506	499.64	-1.11111	0.317513	-3.49941	0.000466293	0.0993301	-1.11111	no
	AT4G34138b	UDP-glucosyl transferase 73B1;(source:Araport11)	protein_coding	UDP-GLUCOSYL TRANSFERASE 73B1 (UGT73B1)	UDP-GLUCOSYL TRANSFERASE 73B1 (UGT73B1)	159	141	108	210	180	239	173.323	0.739657	0.256742	2.88094	0.00396491	0.322487	0.739657	yes
	AT4G39950	Belongs to cytochrome P450 and is involved in tryptophan metabolism. Converts Trp to indo-3-acetaldoxime (IAOx), a precursor to IAA and indole glucosinolates. The mRNA is cell-to-cell mobile.	protein_coding	CYTOCHROME P450, FAMILY 79, SUBFAMILY B, POLYPEPTIDE 2 (CYP79B2)	CYTOCHROME P450, FAMILY 79, SUBFAMILY B, POLYPEPTIDE 2 (CYP79B2)	311	204	258	491	219	591	347.094	0.879898	0.339537	2.59146	0.00955683	0.50365	0.879898	yes
	AT5G07460	ubiquitous enzyme that repairs oxidatively damaged proteins. Methionine sulfoxide reductase activity. Mutant lacking reductase activity showed increased protein oxidation, nitration and glycation of specific amino acid residues during darkness.	protein_coding	PEPTIDEMETHIONINE SULFOXIDE REDUCTASE 2 (PMSR2)	ARABIDOPSIS THALIANA METHIONINE SULFOXIDE REDUCTASE 2 (ATMSRA2);PEPTIDEMETHIONINE SULFOXIDE REDUCTASE 2 (PMSR2)	74	64	70	108	126	139	97.1116	0.951301	0.271385	3.50536	0.000455984	0.0981675	0.951301	yes
	AT5G08790	induced by wounding, belongs to a large family of putative transcriptional activators with NAC domain.	protein_coding	(ATAF2)	(ATAF2);ARABIDOPSIS NAC DOMAIN CONTAINING PROTEIN 81 (anac081)	1677	1306	1248	650	588	1015	1056.97	-0.798109	0.22744	-3.5091	0.000449621	0.0978386	-0.798109	no
	AT5G17990b	Encodes the tryptophan biosynthetic enzyme phosphoribosylanthranilate transferase (PAT1, called trpD in bacteria). Converts anthranilate and phosphoribosylpyrophosphate into phosphoribosylanthranilate and inorganic pyrophosphate. The mRNA is cell-to-cell mobile.	protein_coding	TRYPTOPHAN BIOSYNTHESIS 1 (TRP1)	PHOSPHORIBOSYLANTHRANILATE TRANSFERASE 1 (pat1);TRYPTOPHAN BIOSYNTHESIS 1 (TRP1)	300	211	304	358	366	379	319.24	0.556109	0.206803	2.68907	0.00716511	0.456221	0.556109	yes
	AT5G24420b,c	Encodes a cytosolic 6-phosphogluconolactonase (PGL) thought to be involved in the oxidative pentose-phosphate pathway (OPPP).	protein_coding	6-PHOSPHOGLUCONOLACTONASE 5 (PGL5)	6-PHOSPHOGLUCONOLACTONASE 5 (PGL5)	2700	1920	3095	8779	2959	4687	4120.4	1.24232	0.357886	3.47128	0.000517985	0.105883	1.24232	yes
	AT5G24780b,c	encodes an acid phosphatase similar to soybean vegetative storage proteins. Gene expression is induced by wounding and jasmonic acid.	protein_coding	VEGETATIVE STORAGE PROTEIN 1 (VSP1)	(ATVSP1);VEGETATIVE STORAGE PROTEIN 1 (VSP1)	70809	80830	76237	115830	129319	115442	98688.2	0.7658	0.171142	4.47464	7.65e-06	0.00569593	0.7658	yes
OPDA regulated genesa	AT1G22810	encodes a member of the DREB subfamily A-5 of ERF/AP2 transcription factor family. The protein contains one AP2 domain. There are 16 members in this subfamily including RAP2.1, RAP2.9 and RAP2.10. Overexpression leands to delayed senescence and delayed flowering.	protein_coding	(ATERF019)	(ERF019); (ATERF019)	231	249	110	58	38	100	127.888	-1.49001	0.417847	-3.56591	0.000362594	0.0872022	-1.49001	no
	AT3G21150	Encodes a protein with a B-box domain predicted to act as a transcription factor. Expression of the BBX32 gene is affected by monochromatic red light. Genetic analysis shows BBX32 is under circadian control; it is a morning gene under clock regulation.	protein_coding	B-BOX DOMAIN PROTEIN 32 (BBX32)	B-BOX DOMAIN PROTEIN 32 (BBX32);EMF1-INTERACTING PROTEIN 6 (EIP6); (ATBBX32)	150	86	207	49	42	53	94.9515	-1.4984	0.370863	-4.0403	5.34e-05	0.0220473	-1.4984	no
	AT4G01950	putative sn-glycerol-3-phosphate 2-O-acyltransferase	protein_coding	GLYCEROL-3-PHOSPHATE SN-2-ACYLTRANSFERASE 3 (GPAT3)	GLYCEROL-3-PHOSPHATE SN-2-ACYLTRANSFERASE 3 (GPAT3);GLYCEROL-3-PHOSPHATE SN-2-ACYLTRANSFERASE 3 (ATGPAT3)	43	57	34	16	6	20	28.8317	-1.57125	0.566425	-2.77398	0.00553746	0.391824	-1.57125	no
	AT4G25100	Fe-superoxide dismutase	protein_coding	FE SUPEROXIDE DISMUTASE 1 (FSD1)	FE SUPEROXIDE DISMUTASE 1 (FSD1)	13237	14484	13546	24257	18985	14951	16753.1	0.617551	0.236983	2.60588	0.00916375	0.496022	0.617551	yes
	AT5G52020	encodes a member of the DREB subfamily A-4 of ERF/AP2 transcription factor family. The protein contains one AP2 domain. There are 17 members in this subfamily including TINY.	protein_coding			29	56	39	12	8	12	25.6975	-1.86312	0.565913	-3.29224	0.000993928	0.157142	-1.86312	no
ajasmonates regulated genes and OPDA regulated genes are annotated by (Taki et al., 2005).
bdifferentially expressed in opr mutant 2 hours after jasmonate treatment (Mandaokar et al., 2006).
cdifferentially expressed in opr mutant 8 hours after jasmonate treatment (Mandaokar et al., 2006).
ddifferentially expressed in opr mutant 22 hours after jasmonate treatment (Mandaokar et al., 2006).

## Sheet: Table S8
Table S8 DEGs involved in ROS homeostasis.
TAIR_ID	Bin IDb	Bin Name	Gene symbols	Name	Description	W2_.sort.bam	W3_.sort.bam	W4_.sort.bam	O1_.sort.bam	O2_.sort.bam	O3_.sort.bam	baseMean	log2FoldChange	lfcSE	stat	P value	P adj
AT2G40300a	15.2	metal handling.binding, chelation and storage	Symbols: ATFER4 | ATFER4 (ferritin 4); binding / ferric iron binding / oxidoreductase/ transition metal ion binding | chr2:16831293-16833280 REVERSE	FERRITIN 4 (FER4)	Encodes FERRITIN 4, AtFER4. Ferritins are a class of 24-mer multi-meric proteins found in all kingdoms of life. Function as the main iron store in mammals. Evidence suggests that Arabidopsis ferritins are essential to protect cells against oxidative damage, but they do not constitute the major iron pool. Localize to mitochondria. Knock out mutants are not sensitive to abiotic stress.	1394	900	1096	1747	1515	1816	1411.92	0.710775	0.187747	3.78581	0.000153209	0.050008
AT3G56090a	15.2	metal handling.binding, chelation and storage	Symbols: ATFER3 | ATFER3 (ferritin 3); binding / ferric iron binding / oxidoreductase/ transition metal ion binding | chr3:20814047-20816035 REVERSE	FERRITIN 3 (FER3)	Encodes FERRITIN 3, AtFER3. Ferritins are a class of 24-mer multi-meric proteins found in all kingdoms of life. Function as the main iron store in mammals. Evidence suggests that Arabidopsis ferritins are essential to protect cells against oxidative damage, but they do not constitute the major iron pool.	2270	1952	1529	2609	2607	3440	2400.43	0.701159	0.195299	3.59017	0.000330456	0.0835931
AT5G01600a	15.2	metal handling.binding, chelation and storage	Symbols: ATFER1, FER1 | ATFER1; ferric iron binding / iron ion binding | chr5:227953-230051 REVERSE	FERRETIN 1 (FER1)	Encodes a ferretin protein that is targeted to the chloroplast. Member of a Ferritin gene family. Gene expression is induced in response to iron overload and by nitric oxide. Expression of the gene is downregulated in the presence of paraquat, an inducer of photoxidative stress.	5852	3602	7714	10732	9481	9365	7839.28	0.912851	0.255698	3.57003	0.000356935	0.0870276
AT5G51010	21.1	redox.thioredoxin	rubredoxin family protein | chr5:20744566-20745703 FORWARD		Rubredoxin-like superfamily protein;(source:Araport11)	892	778	972	1189	1239	1072	1025.48	0.521879	0.179927	2.90051	0.00372553	0.31678
AT3G19010	21.2	redox.ascorbate and glutathione	oxidoreductase, 2OG-Fe(II) oxygenase family protein | chr3:6556197-6557938 REVERSE		2-oxoglutarate (2OG) and Fe(II)-dependent oxygenase superfamily protein;(source:Araport11)	225	161	202	116	128	97	152.09	-0.662849	0.254403	-2.6055	0.0091739	0.496022
AT4G15690a	21.4	redox.glutaredoxins	glutaredoxin family protein | chr4:8934324-8934921 FORWARD	(GRXS5)	Thioredoxin superfamily protein;(source:Araport11)	46	35	42	109	90	62	65.0299	1.21808	0.376578	3.23461	0.00121807	0.178624
AT1G65970a	21.5	redox.peroxiredoxin	Symbols: TPX2 | TPX2 (thioredoxin-dependent peroxidase 2); antioxidant/ oxidoreductase | chr1:24557372-24558322 REVERSE	THIOREDOXIN-DEPENDENT PEROXIDASE 2 (TPX2)	thioredoxin-dependent peroxidase 2	12	14	16	46	56	32	29.9264	1.7849	0.501367	3.56008	0.000370743	0.0872022
AT4G25100a	21.6	redox.dismutases and catalases	Symbols: FSD1 | FSD1 (FE SUPEROXIDE DISMUTASE 1); copper ion binding / superoxide dismutase | chr4:12884300-12886695 REVERSE	FE SUPEROXIDE DISMUTASE 1 (FSD1)	Fe-superoxide dismutase	13237	14484	13546	24257	18985	14951	16753.1	0.617551	0.236983	2.60588	0.00916375	0.496022
AT5G16960	26.7	misc.oxidases - copper, flavone etc	NADP-dependent oxidoreductase, putative | chr5:5574281-5575910 REVERSE		Zinc-binding dehydrogenase family protein;(source:Araport11)	11109	8906	7613	5350	3338	4650	6700.28	-0.920206	0.233764	-3.93647	8.27e-05	0.0304252
AT3G43670	26.7	misc.oxidases - copper, flavone etc	copper amine oxidase, putative | chr3:15567099-15569901 FORWARD		Copper amine oxidase family protein;(source:Araport11)	152	213	127	320	311	484	270.342	1.26987	0.292606	4.33988	1.43e-05	0.00874232
AT1G62560	26.7	misc.oxidases - copper, flavone etc	Symbols: FMO GS-OX3 | FMO GS-OX3 (FLAVIN-MONOOXYGENASE GLUCOSINOLATE S-OXYGENASE 3); 3-methylthiopropyl glucosinolate S-oxygenase/ 4-methylthiopropyl glucosinolate S-oxygenase/ 5-methylthiopropyl glucosinolate S-oxygenase/ 6-methylthiopropyl glucosinolate S-oxygenase/ 7-methyl | chr1:23159823-23162649 FORWARD	FLAVIN-MONOOXYGENASE GLUCOSINOLATE S-OXYGENASE 3 (FMO GS-OX3)	belongs to the flavin-monooxygenase (FMO) family, encodes a glucosinolate S-oxygenase that catalyzes the conversion of methylthioalkyl glucosinolates to methylsulfinylalkyl glucosinolates The mRNA is cell-to-cell mobile.	6	8	6	16	54	25	19.3467	2.33283	0.68637	3.3988	0.000676827	0.12566
AT5G44400	26.8	misc.nitrilases, *nitrile lyases, berberine bridge enzymes, reticuline oxidases, troponine reductases	FAD-binding domain-containing protein | chr5:17886194-17888480 REVERSE	(ATBBE26)	FAD-binding Berberine family protein;(source:Araport11)	1149	597	204	190	267	257	425.819	-1.31265	0.432081	-3.03797	0.0023818	0.251044
AT1G78370	26.9	misc.glutathione S transferases	Symbols: ATGSTU20 | ATGSTU20 (GLUTATHIONE S-TRANSFERASE TAU 20); glutathione transferase | chr1:29484269-29485290 REVERSE	GLUTATHIONE S-TRANSFERASE TAU 20 (GSTU20)	Encodes glutathione transferase belonging to the tau class of GSTs. Naming convention according to Wagner et al. (2002).	2146	1737	2155	2397	2786	2740	2322.03	0.504515	0.149006	3.38587	0.00070952	0.12912
AT2G30860	26.9	misc.glutathione S transferases	Symbols: ATGSTF9, GLUTTR, ATGSTF7 | ATGSTF9 (GLUTATHIONE S-TRANSFERASE PHI 9); copper ion binding / glutathione binding / glutathione peroxidase/ glutathione transferase | chr2:13138997-13140245 FORWARD	GLUTATHIONE S-TRANSFERASE PHI 9 (GSTF9)	Encodes glutathione transferase belonging to the phi class of GSTs. Naming convention according to Wagner et al. (2002).	6529	6266	5340	9865	6769	9763	7463.01	0.659347	0.212749	3.09919	0.00194053	0.227096
AT2G18150	26.12	misc.peroxidases	peroxidase, putative | chr2:7892133-7893653 REVERSE		Peroxidase superfamily protein;(source:Araport11)	52	42	35	281	356	544	221.627	3.29629	0.300842	10.9569	6.16e-28	1.25e-23
AT2G38380	26.12	misc.peroxidases	peroxidase 22 (PER22) (P22) (PRXEA) / basic peroxidase E | chr2:16076384-16078583 FORWARD		Peroxidase superfamily protein;(source:Araport11)	4	2	0	18	22	63	18.3001	4.20458	0.924712	4.54691	5.44e-06	0.00440679
AT4G36430	26.12	misc.peroxidases	peroxidase, putative | chr4:17204478-17205966 REVERSE		Peroxidase superfamily protein;(source:Araport11)	136	209	141	1152	1019	1938	781.448	3.16366	0.296027	10.6871	1.17e-26	1.18e-22
AT5G05340	26.12	misc.peroxidases	peroxidase, putative | chr5:1578951-1580875 REVERSE	PEROXIDASE 52 (PRX52)	Encodes a protein with sequence similarity to peroxidases that is involved in lignin biosynthesis. Loss of function mutations show abnormal development of xylem fibers and reduced levels of lignin biosynthetic enxymes.	2	20	13	29	44	66	29.4215	2.03327	0.686239	2.96292	0.00304734	0.281594
AT5G66390	26.12	misc.peroxidases	peroxidase 72 (PER72) (P72) (PRXR8) | chr5:26515916-26517391 REVERSE	PEROXIDASE 72 (PRX72)	Encodes a peroxidase that is involved in lignin biosynthesis.	16	19	16	69	85	152	60.1993	2.67375	0.432188	6.18656	6.15e-10	2.49e-06
aannoated as ROS savengers in (Mittler et al., 2004).
bBin ID in MapMan database.

## Sheet: Table S9
Table S9 Real-time PCR and transcriptome analysis results for genes in sporopollenin synthesis and AMS regulation pathways.
		Quantitative realtime PCR									RNA sequencing
TAIR_ID	Name	W1	W2	W3	O1	O2	O3	baseMean	log2FoldChange	P value	W2_.sort.bam	W3_.sort.bam	W4_.sort.bam	O1_.sort.bam	O2_.sort.bam	O3_.sort.bam	baseMean	log2FoldChange	pvalue
AT1G62940	ACOS5	1.79621	1.9529	1.79959	0.191719	0.242491	0.212042	1.03249	-3.10198	6.96757e-06	952.434	1147.64	2748.69	1336.36	389.447	757.944	1230.78	-0.955488	0.158063
AT1G01280	CYP703A2	1.13417	1.13108	1.03523	2.40807	1.91702	2.06529	1.61515	0.953225	0.00229758	1479.52	2746.29	3102.8	2790.66	1074.75	1538.53	2122.89	-0.438237	0.212005
AT1G69500	CYP704B1	1.30234	1.39523	1.38753	0.740778	0.577535	0.69968	1.01718	-1.01745	0.000275099	309.585	184.737	764.331	233.668	91.5755	129.933	299.095	-1.53982	0.00127652
AT3G11980	MS2	3.70866	3.51687	3.63974	0.225787	0.212708	0.272698	1.92941	-3.36361	5.51853e-07	1583.88	1814.34	4490.2	2577.02	873.489	1445.01	2157.61	-0.684827	0.285976
AT4G34850	PKSB	2.40278	2.37037	2.1833	0.604183	0.675398	0.601413	1.47291	-1.88686	2.00534e-05	1338.32	1515.05	3133.76	2087.43	600.775	921.344	1600.18	-0.728757	0.276112
AT1G02050	PKSA	5.04007	4.40575	4.1217	8.67274	7.00078	7.69687	6.15632	0.784524	0.00418037	3488.75	4699.96	7652.02	5056.13	2253.16	2473.65	4272.21	-0.694175	0.0439319
AT4G35420	TKPR1	6.71517	7.77326	9.31216	11.3063	10.8628	13.8589	9.97143	0.598121	0.027367	672.668	625.423	1715.39	883.487	350.201	609.308	809.755	-0.708602	0.0792439
AT1G68540	TKPR2	2.5779	2.55756	2.45512	1.06646	0.912114	0.879225	1.7414	-1.4093	2.18022e-05	1621.59	1780.29	2879.3	2392.31	1035.51	976.467	1781.68	-0.511172	0.141715
AT5G56110	MS188	0.1669	0.151488	0.171669	0.130685	0.108877	0.113875	0.140582	-0.471498	0.00711675	17.5402	35.0897	66.758	48.959	6.03794	11.8121	31.0484	-0.841482	0.266356
AT4G21330	DYT1	0.00725946	0.00624568	0.00794458	0.00673372	0.0110924	0.0160576	0.00922225	0.659634	0.204687	NA	NA	NA	NA	NA	NA	NA	NA	NA
AT2G31220	bHLH010	0.678649	0.828954	0.647783	0.186134	0.176377	0.145844	0.443957	-2.08404	0.000661297	194.696	196.09	238.974	175.807	122.772	210.649	190.452	-0.296192	0.276941
AT1G06170	bHLH089	0.218056	0.238374	0.224557	0.0603254	0.0555429	0.0599625	0.142803	-1.95344	1.08238e-05	307.831	294.134	258.324	176.92	163.024	229.352	238.327	-0.594488	0.0104965
AT2G31210	bHLH091	0.130465	0.121491	0.113673	0.0135453	0.0195885	0.0138456	0.068768	-2.96028	3.48233e-05	71.9149	39.2179	100.621	21.1414	14.0885	28.5459	45.9362	-1.73109	0.000439149
